# Supplementary material for: Lithium aluminate flotation by pH- and light-switchable collectors based on the natural product punicine
Source: Royal Society of Chemistry journal article supplement (doi:10.1039/d4ra00116h), 2024-01-01

Supporting information

## Lithium aluminate flotation by pH- and light-switchable collectors based on the natural product punicine

Ali Zgheib, Sophie Acker, Maximilian Hans Fischer, Jan C. Namyslo, Franziska Strube, Martin Rudolph, Ursula E. A. Fittschen, Annett Wollmann, Alfred P. Weber, Martin Nieger, and Andreas Schmidt\*

### Contents

|     |                                                                                             |    |
|-----|---------------------------------------------------------------------------------------------|----|
| 1.  | NMR spectra of punicine <b>1</b> .....                                                      | 2  |
| 2.  | NMR spectra of punicine <b>2</b> .....                                                      | 3  |
| 3.  | NMR spectra of punicine <b>3</b> .....                                                      | 5  |
| 4.  | NMR spectra of punicine <b>4</b> .....                                                      | 6  |
| 5.  | NMR spectra of punicine <b>5</b> .....                                                      | 8  |
| 6.  | UV spectrum of punicine <b>2</b> .....                                                      | 10 |
| 7.  | UV spectrum of punicine <b>3</b> .....                                                      | 10 |
| 8.  | UV spectrum of punicine <b>4</b> .....                                                      | 11 |
| 9.  | Zeta potential measurements .....                                                           | 11 |
| 10. | Crystallographic data .....                                                                 | 14 |
| 11. | Flotation of LiAlO <sub>2</sub> using punicine <b>5</b> at pH 2.....                        | 22 |
| 12. | XRD of Lithium aluminate and Gehlenite mix.....                                             | 22 |
| 13. | Wettability measurements .....                                                              | 23 |
| 14. | Contact angle measurements of lithium aluminate and gehlenite with punicine <b>2-5</b> .... | 24 |
| 15. | Specification of the LEDs.....                                                              | 25 |

# 1. NMR spectra of punicine 1

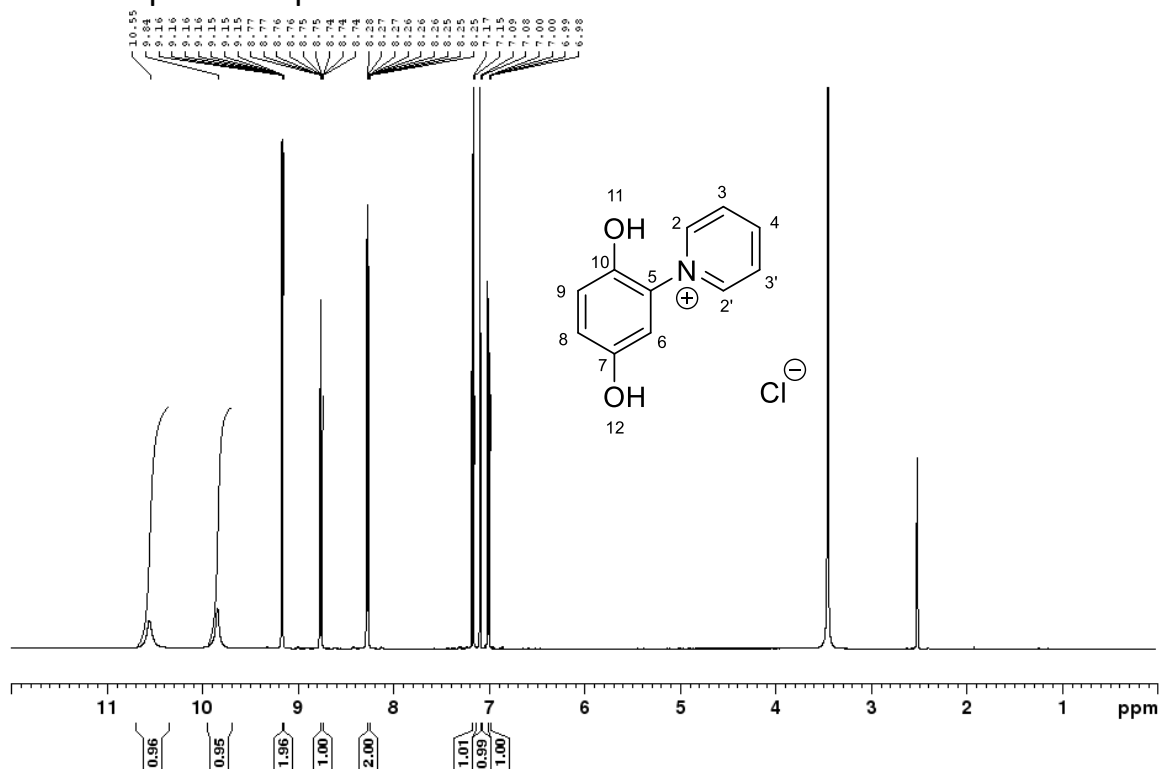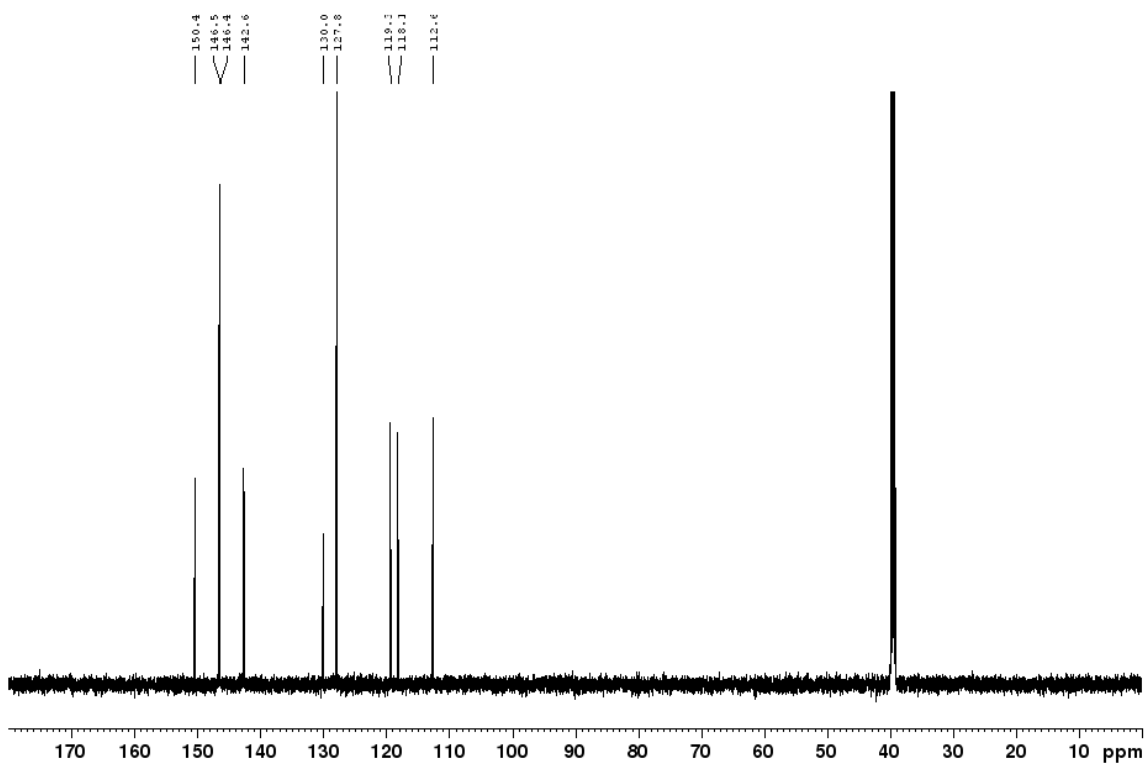

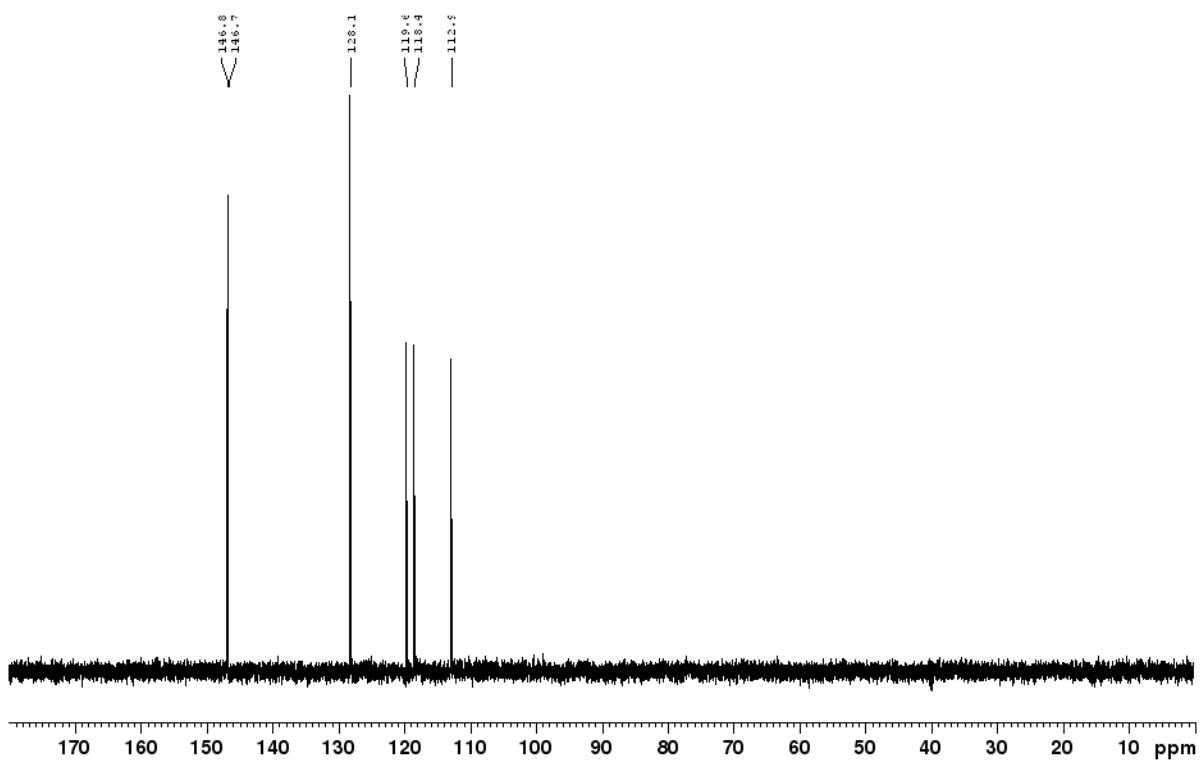

Figure 3: DEPT-135-spectrum of 1.

## 2. NMR spectra of punicine 2

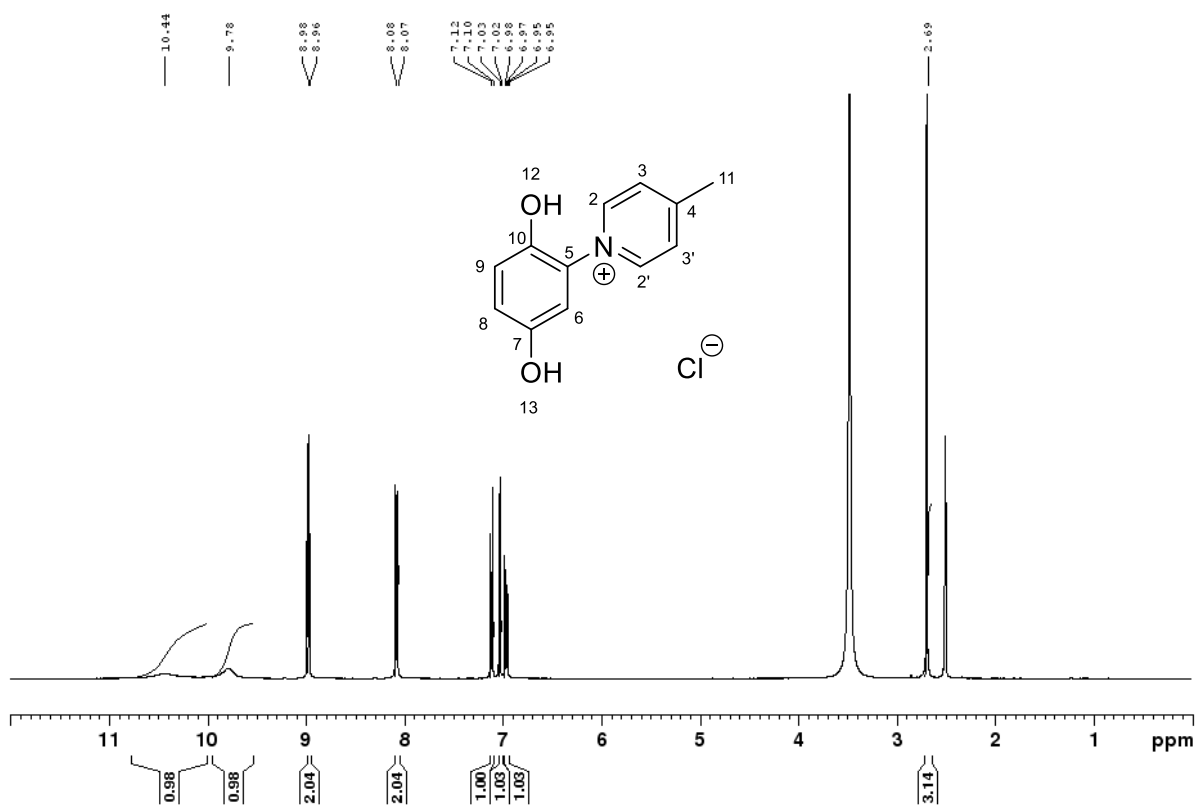

Figure 4:  $^1\text{H}$ -NMR of 4.

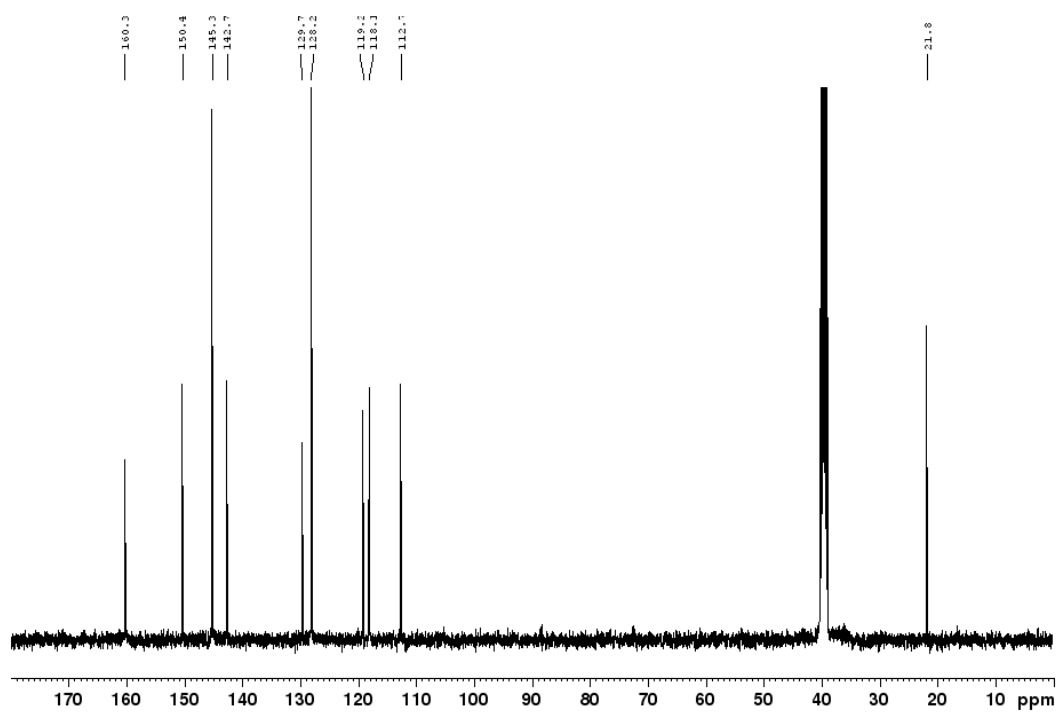

Figure 5:  $^{13}\text{C}$ -NMR of 4.

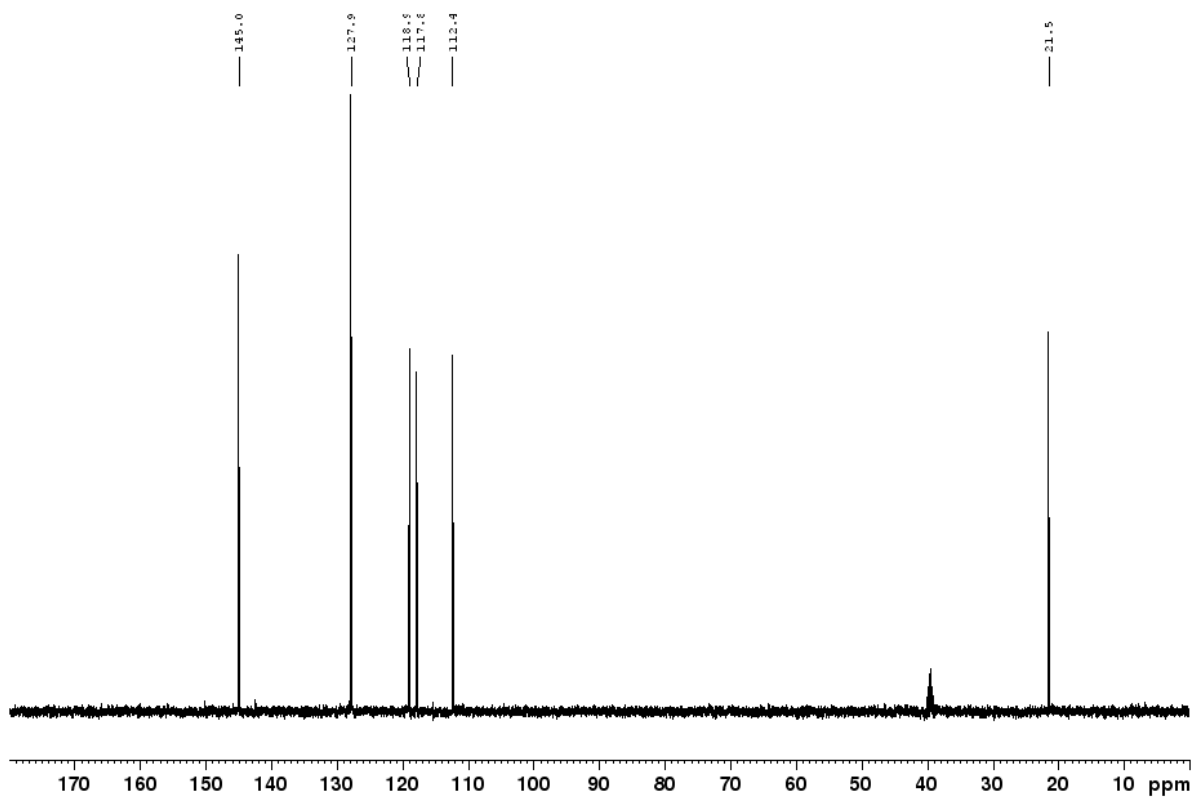

Figure 6: DEPT-135-spectrum of 4.

### 3. NMR spectra of punicine 3

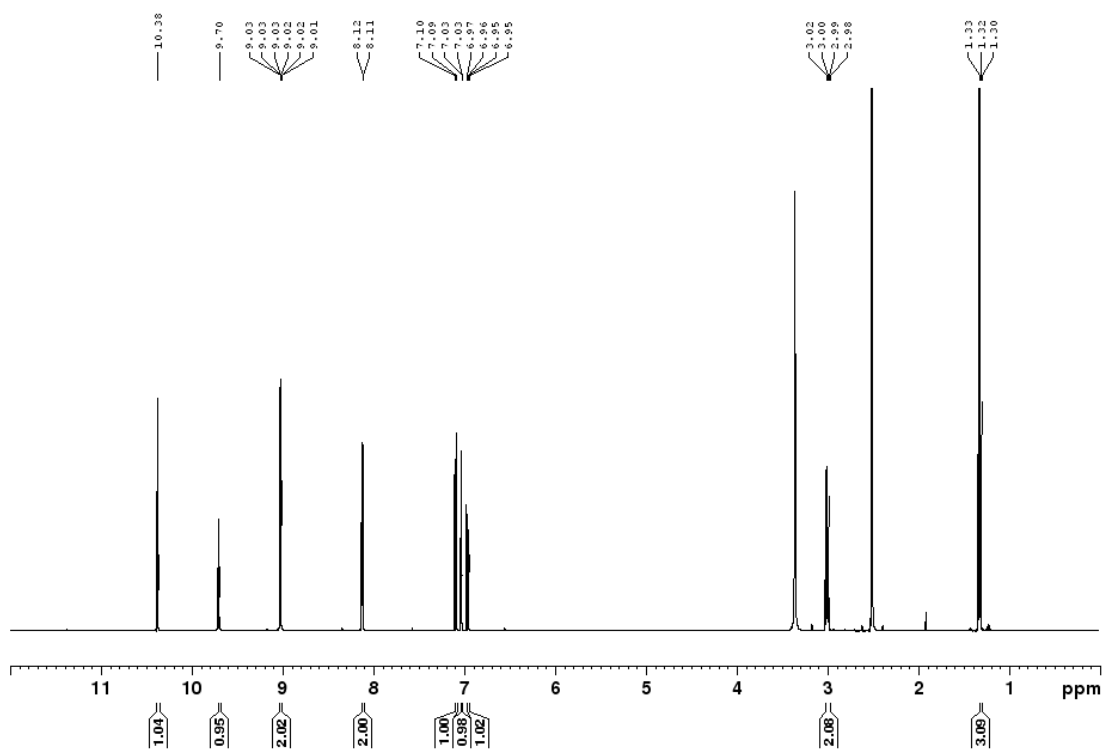

Figure 7:  $^1\text{H}$ -NMR of 3.

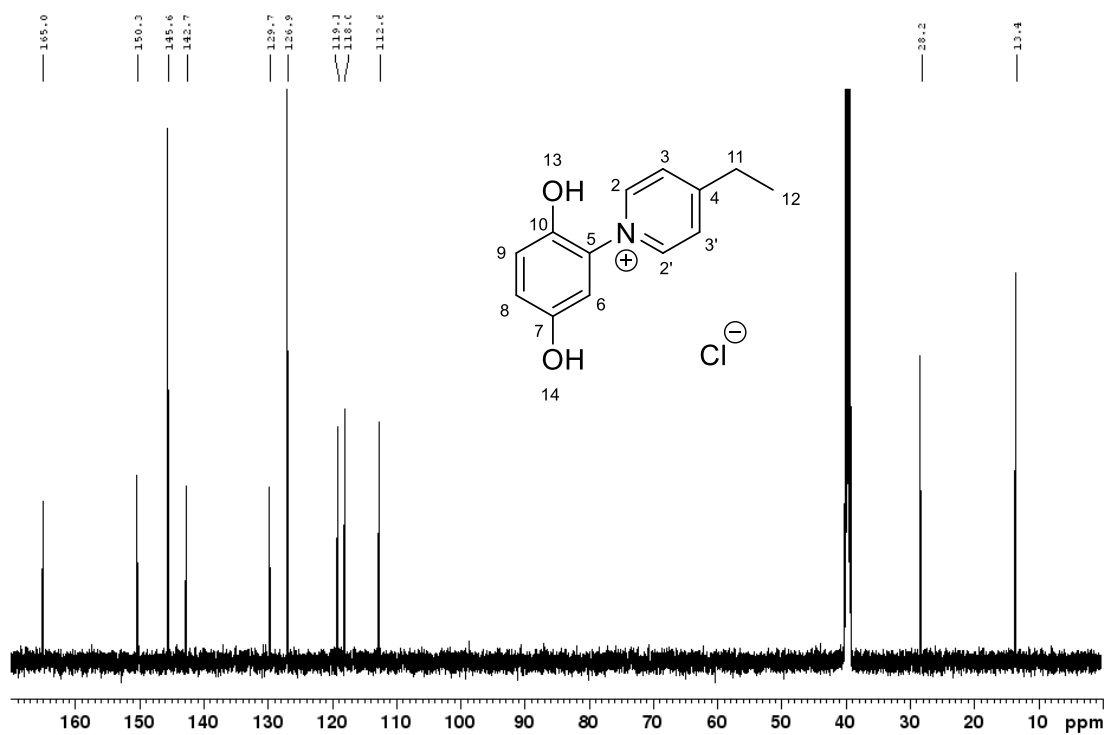

Figure 8:  $^{13}\text{C}$ -NMR of 3.

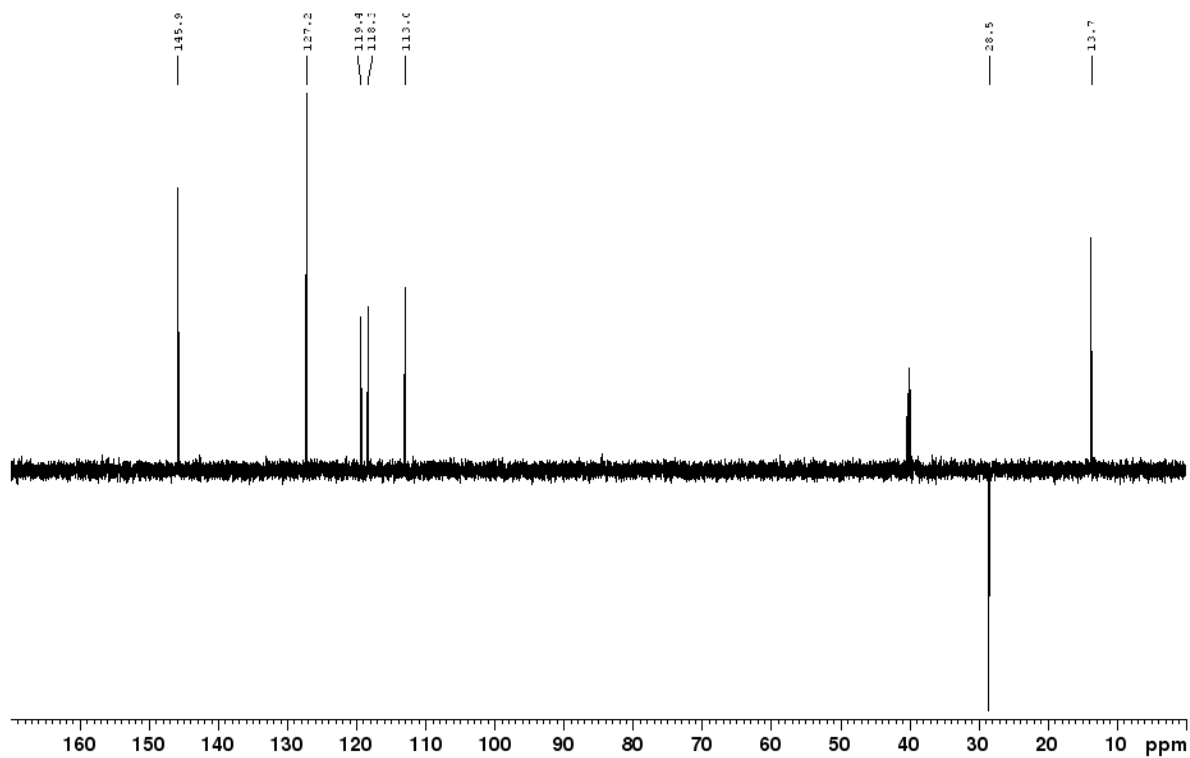

Figure 9: DEPT-135-spectrum of 3.

#### 4. NMR spectra of punicine 4

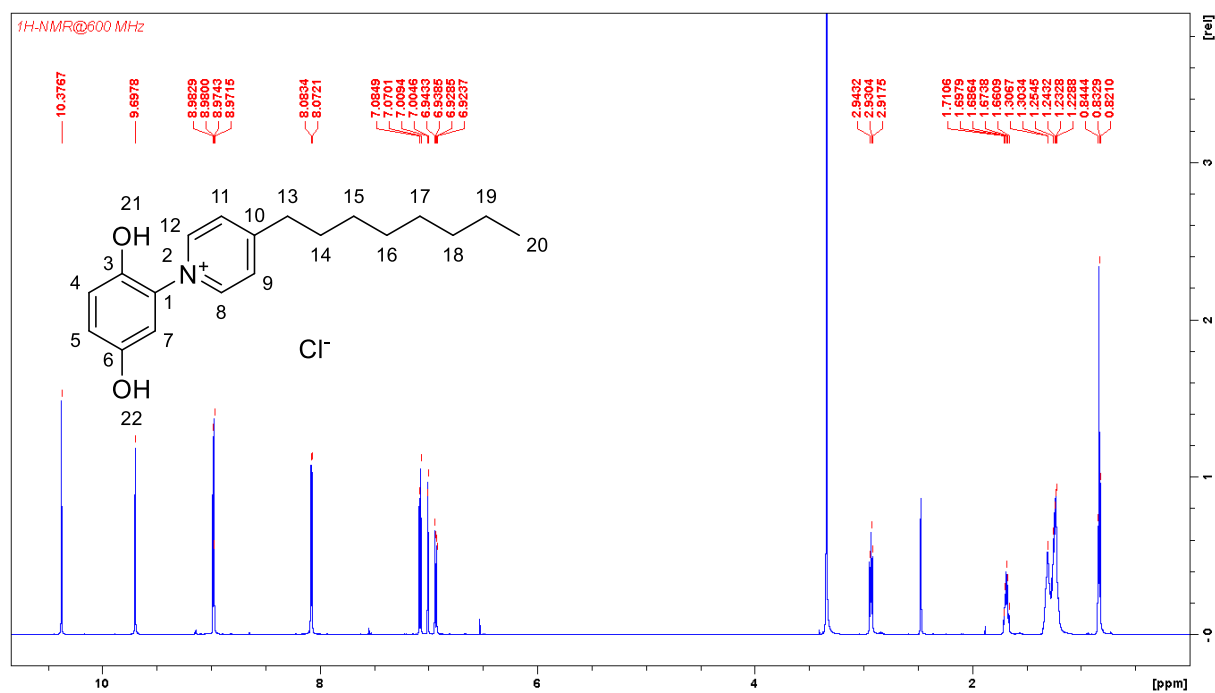

Figure 10: <sup>1</sup>H-NMR of 4.

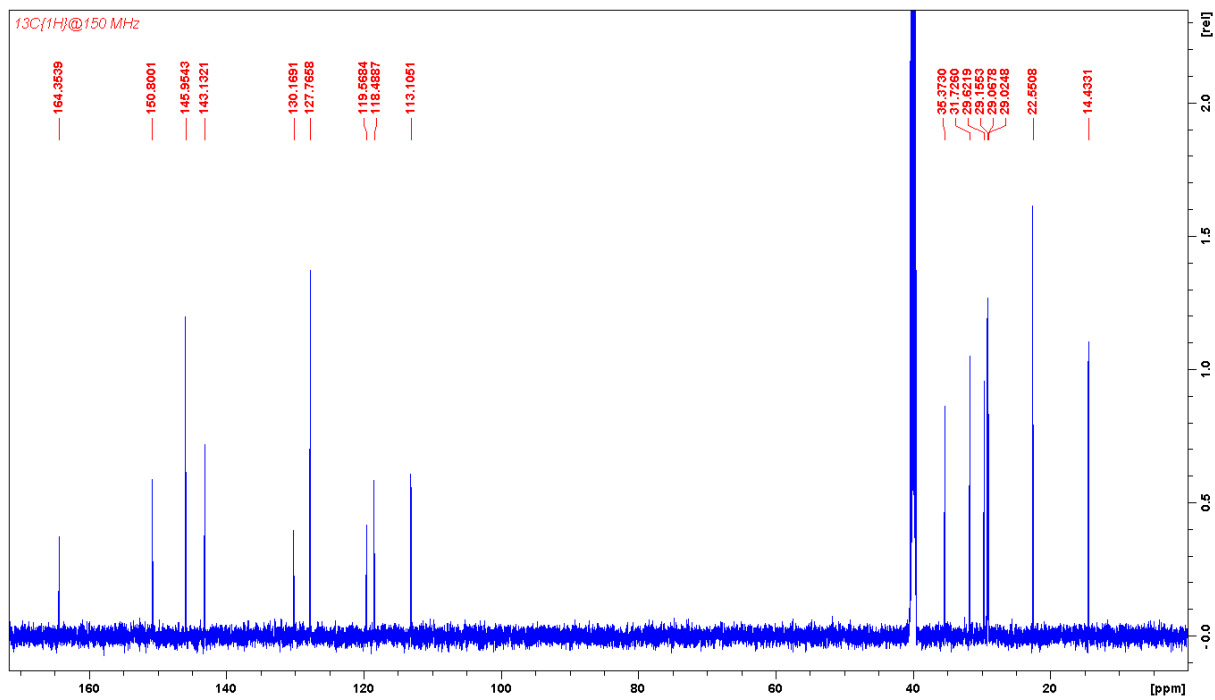

Figure 11: <sup>13</sup>C-NMR of 4.

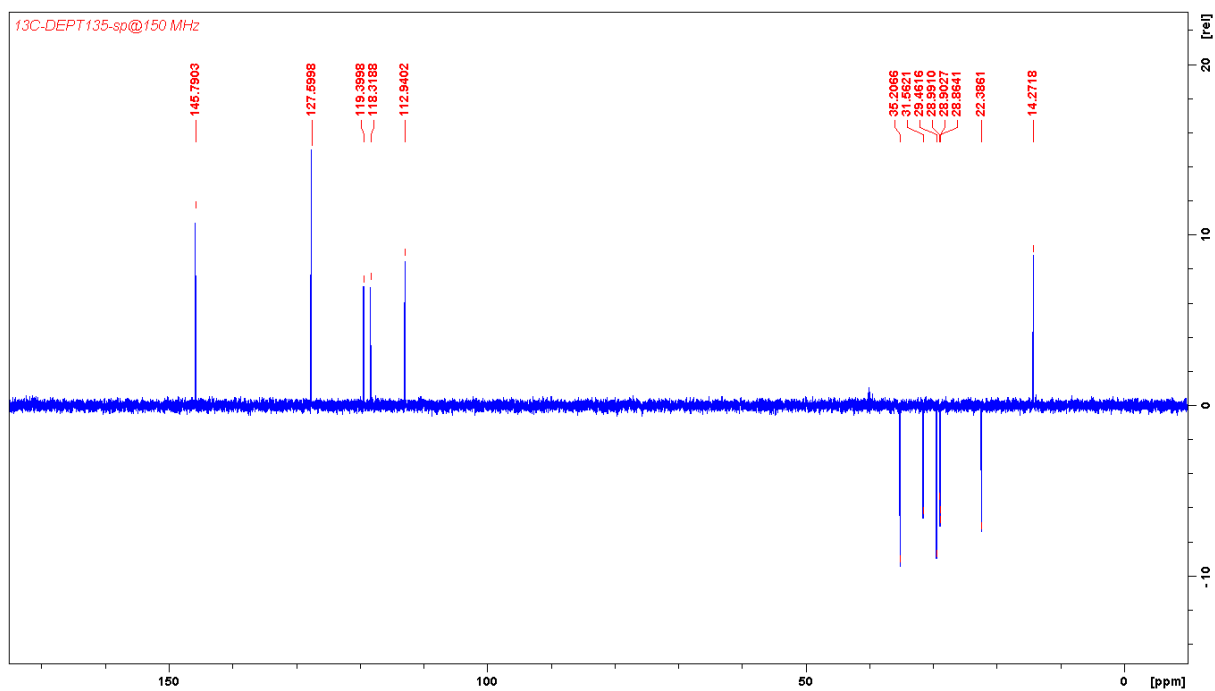

Figure 12: DEPT-135-spectrum of 4.

## 5. NMR spectra of punicine 5

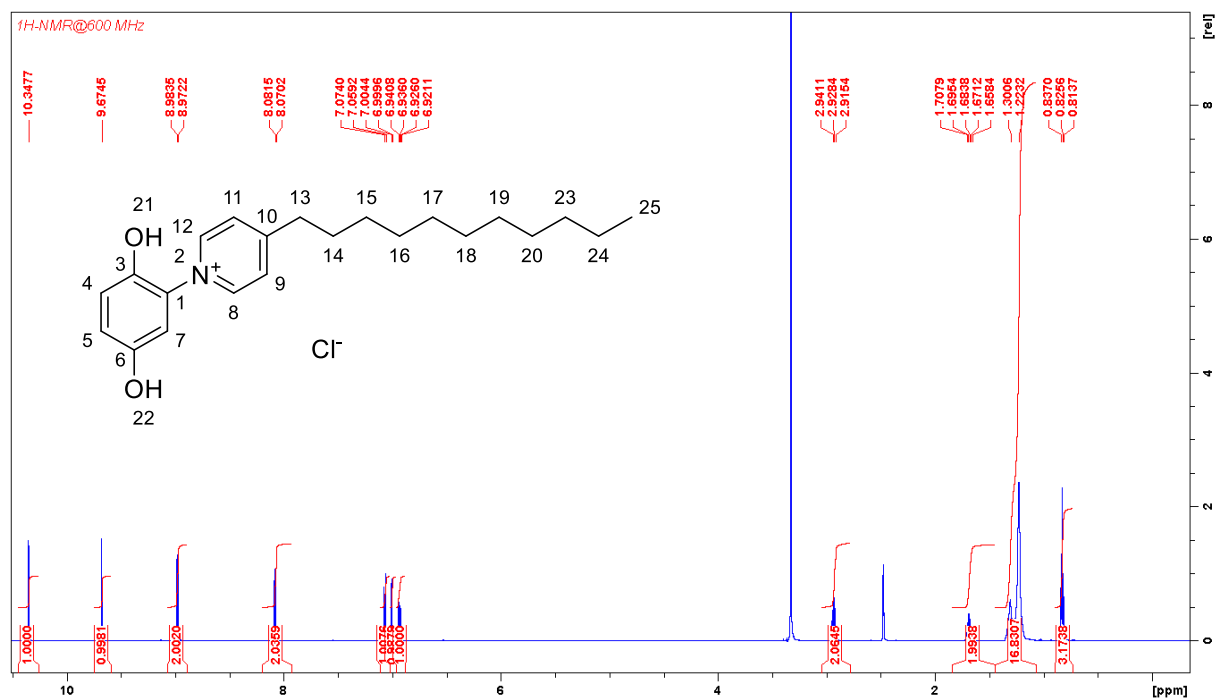

Figure 13: <sup>1</sup>H-NMR of 5.

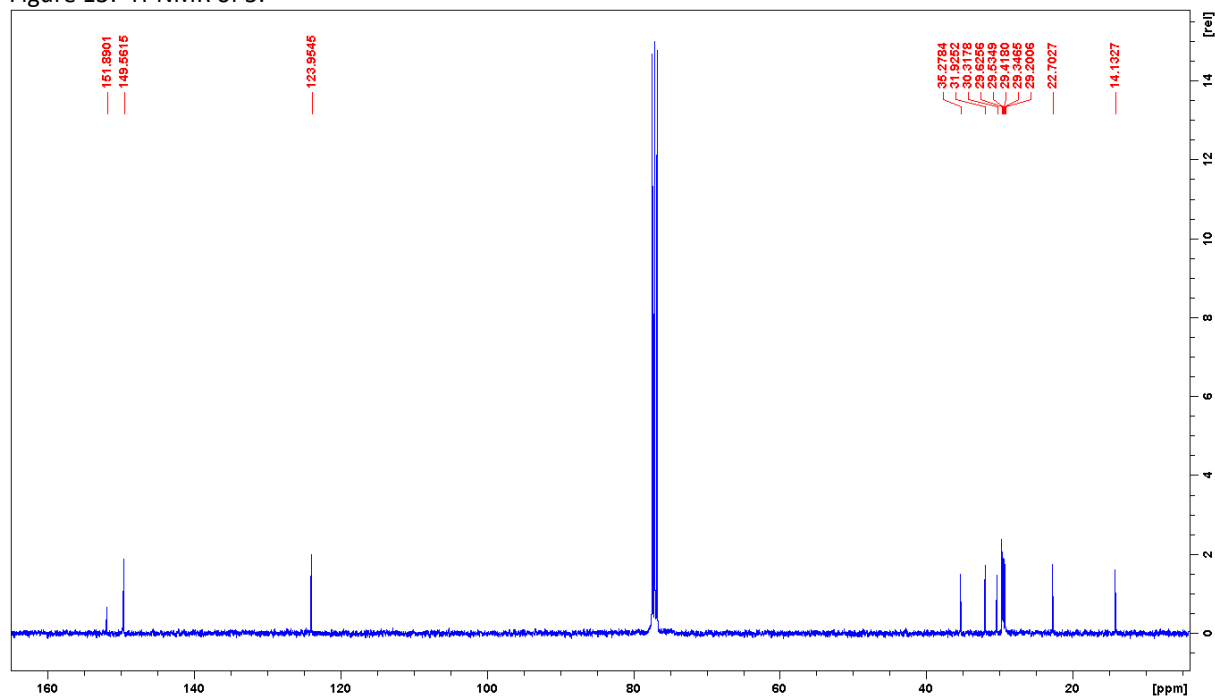

Figure 14: <sup>13</sup>C-NMR of 5.



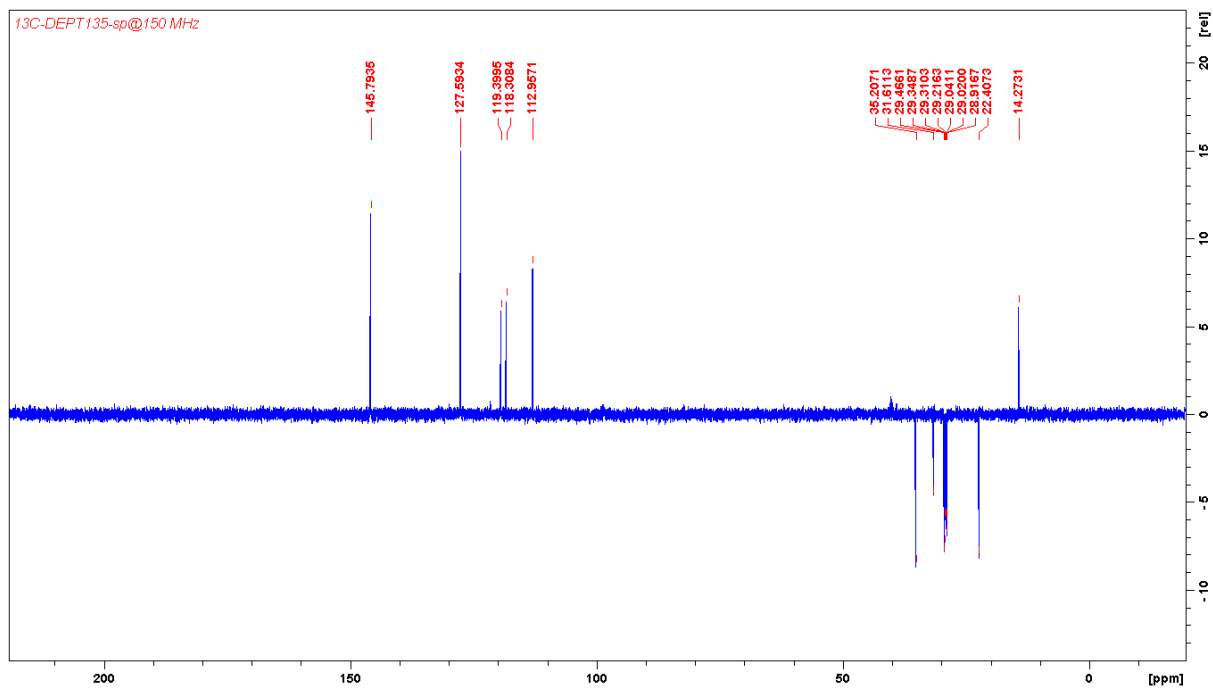

Figure 15: DEPT-135-spectrum of 5.

6. UV spectrum of punicine 2

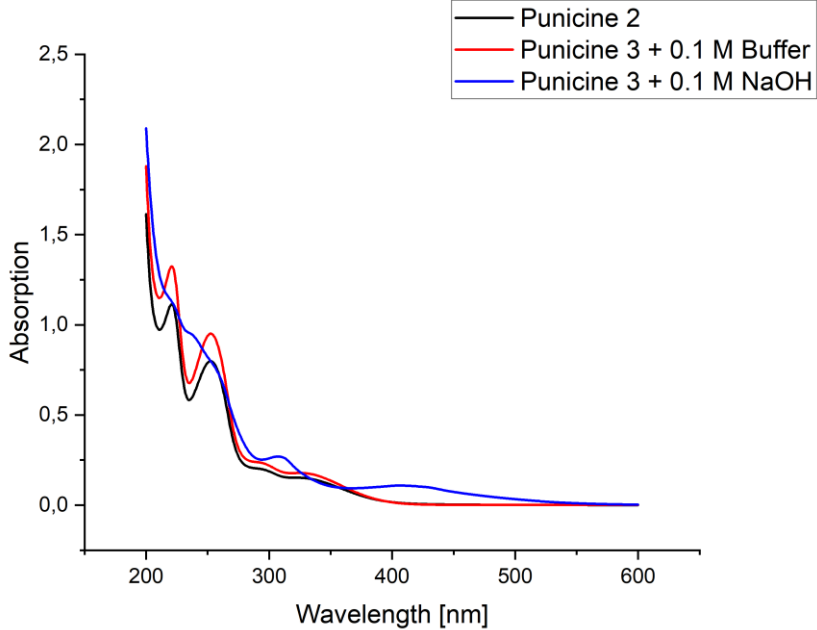

Figure 16: UV spectrum of punicine 3.

7. UV spectrum of punicine 3

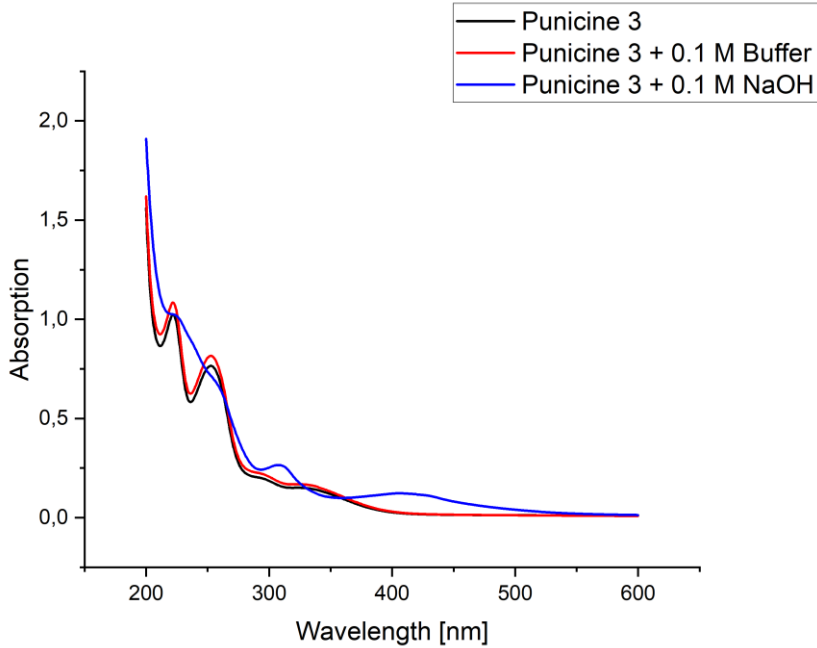

Figure 17: UV spectrum of punicine 3.

### 8. UV spectrum of punicine 4

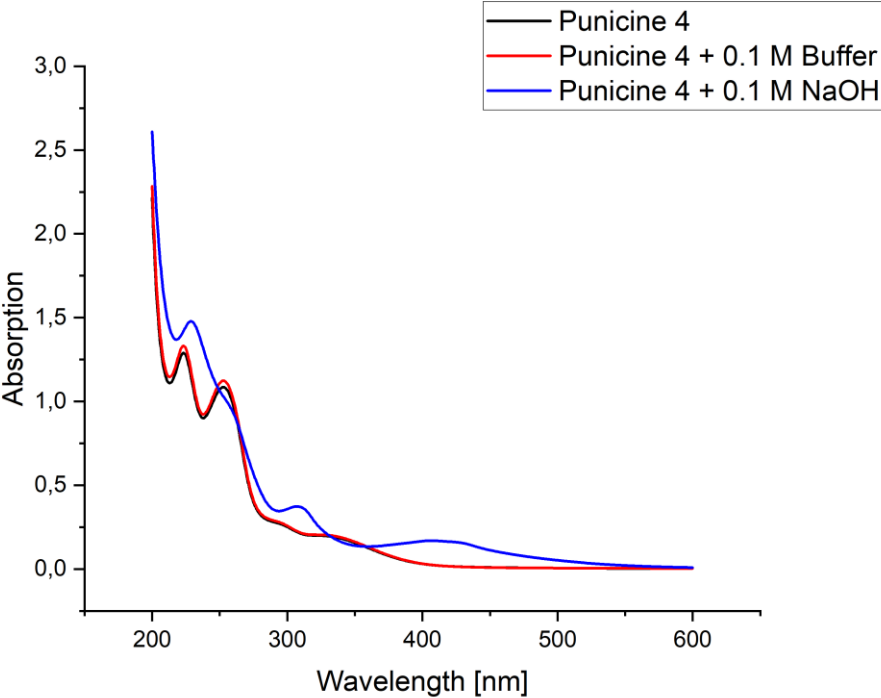

Figure 18: UV spectrum of punicine 4.

### 9. Zeta potential measurements

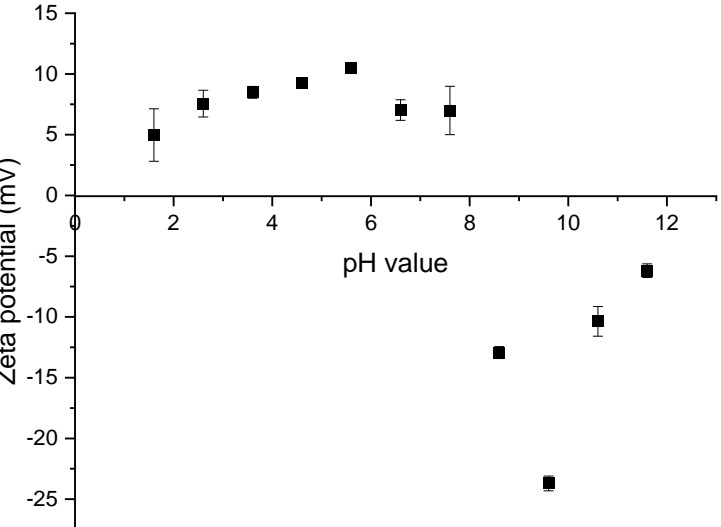

Figure 19: Zeta potential of the pure lithium aluminate.

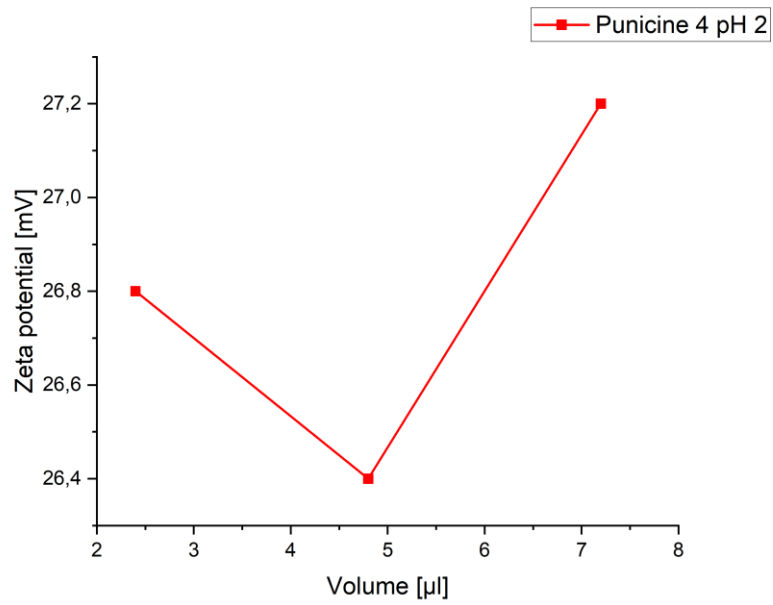

Figure 20: Zeta potential of punicine 4 + LiAlO<sub>2</sub> pH 2 at different concentrations.

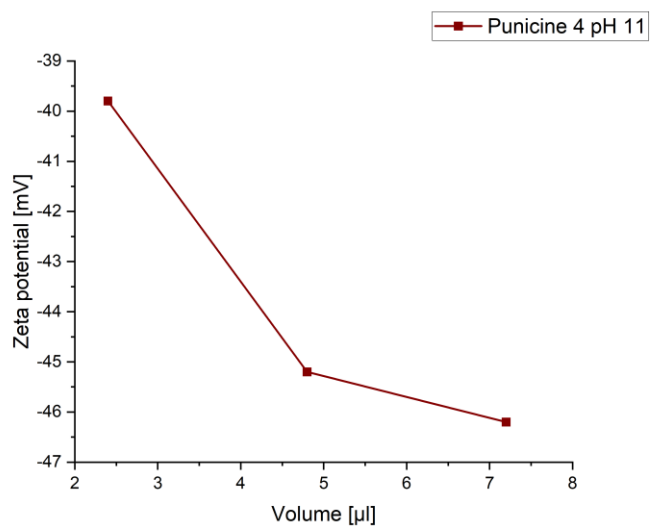

Figure 21: Zeta potential of punicine 4 + LiAlO<sub>2</sub> pH 11 at different concentrations.

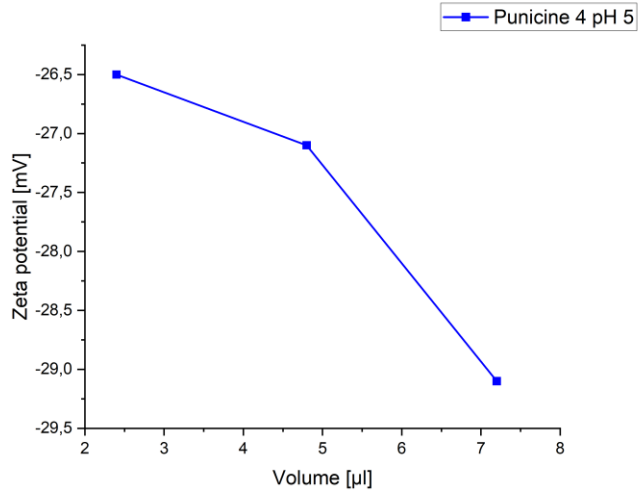

Figure 22: Zeta potential of punicine 4 + LiAlO<sub>2</sub> pH 5 at different concentrations.

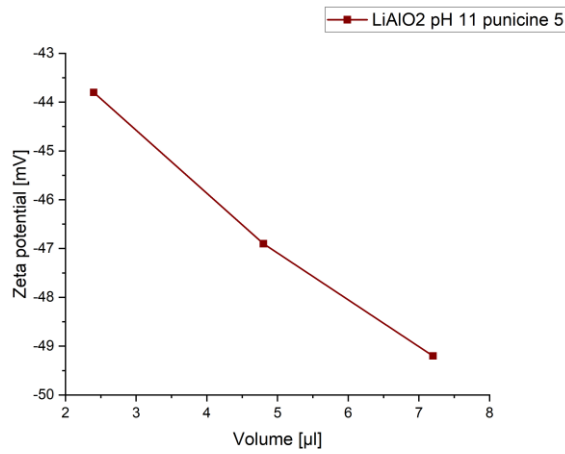

Figure 23: Zeta potential of punicine 5 + LiAlO<sub>2</sub> pH 11 at different concentrations.

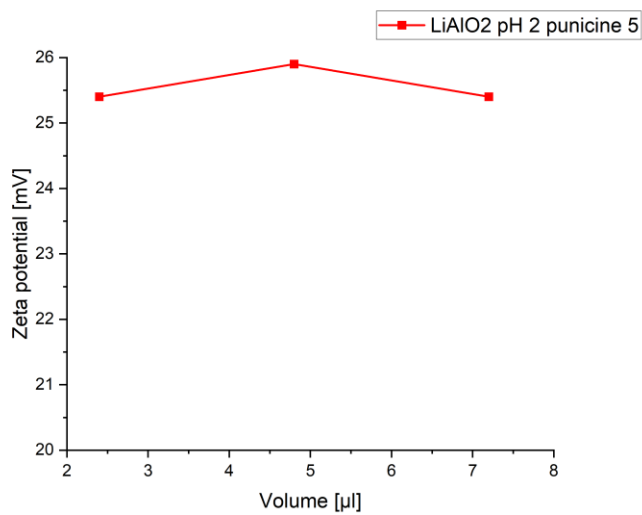

Figure 24: Zeta potential of punicine 5 + LiAlO<sub>2</sub> pH 2 at different concentrations.

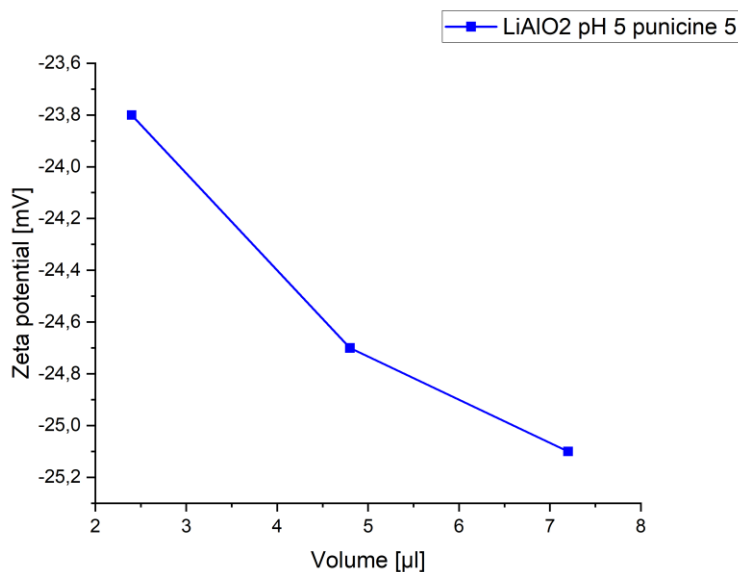

Figure 25: Zeta potential of punicine 5 + LiAlO<sub>2</sub> pH 5 at different concentrations.

## 10. Crystallographic data

### Crystal structure determination of punicine 3 [1-(2,5-dihydroxyphenyl)-4-ethylpyridin-1-ium chloride water solvate]

The single-crystal X-ray diffraction study was carried out on a Bruker D8 Venture diffractometer with PhotonII detector at 173(2) K using Mo-K $\alpha$  radiation ( $\lambda = 0.71073$  Å). Dual space methods (SHELXT) [G. M. Sheldrick, *Acta Crystallogr.* 2015, **A71**, 3-8] were used for structure solution and refinement was carried out using SHELXL-2014 (full-matrix least-squares on  $F^2$ ) [G. M. Sheldrick, *Acta Crystallogr.* 2015, **C71**, 3-8]. Hydrogen atoms were localized by difference electron density determination and refined using a riding model (H(O) free). A semi-empirical absorption correction was applied.

**3**: yellow crystals, C<sub>13</sub>H<sub>14</sub>NO<sub>2</sub><sup>+</sup> · Cl<sup>-</sup> · H<sub>2</sub>O,  $M_r = 269.72$ , crystal size 0.35 × 0.20 × 0.15 mm, monoclinic, space group  $P2_1/n$  (No. 14),  $a = 11.9361(3)$  Å,  $b = 7.3938(2)$  Å,  $c = 14.4601(4)$  Å,  $\beta = 93.592(1)^\circ$ ,  $V = 1273.64(6)$  Å<sup>3</sup>,  $Z = 4$ ,  $\rho = 1.407$  Mg/m<sup>-3</sup>,  $\mu(\text{Mo-K}\alpha) = 0.30$  mm<sup>-1</sup>,  $F(000) = 568$ ,  $T = 173(2)$  K,  $2\theta_{\text{max}} = 55.2^\circ$ , 31472 reflections, of which 2944 were independent ( $R_{\text{int}} = 0.054$ ), 175 parameters, 6 restraints,  $R_1 = 0.030$  (for 2801 I > 2 $\sigma$ (I)),  $wR_2 = 0.083$  (all data),  $S = 1.05$ , largest diff. peak / hole = 0.28 / -0.19 e Å<sup>-3</sup>.

CCDC 2291748 (**3**) contains the supplementary crystallographic data for this paper. These data can be obtained free of charge from The Cambridge Crystallographic Data Centre via [www.ccdc.cam.ac.uk/data\\_request/cif](http://www.ccdc.cam.ac.uk/data_request/cif).

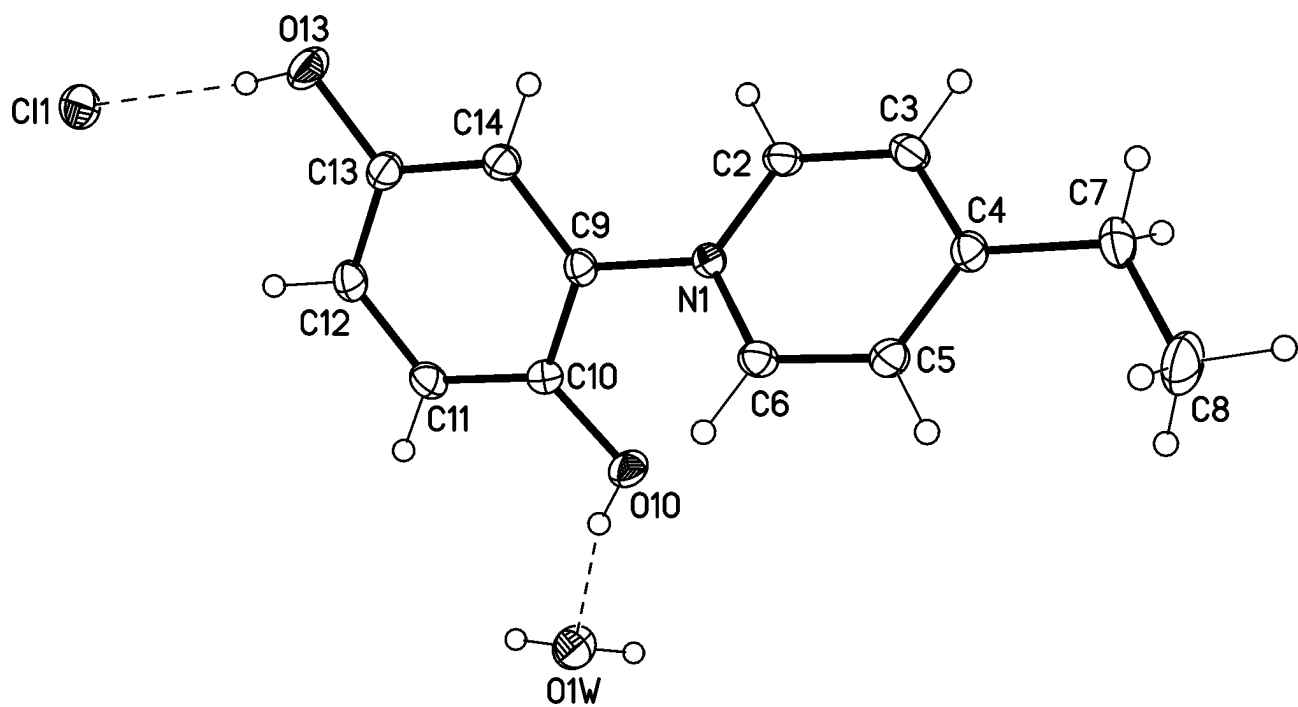

Fig. 1x. Molecular structure of **3** (displacement parameters are drawn at 50 % probability level).

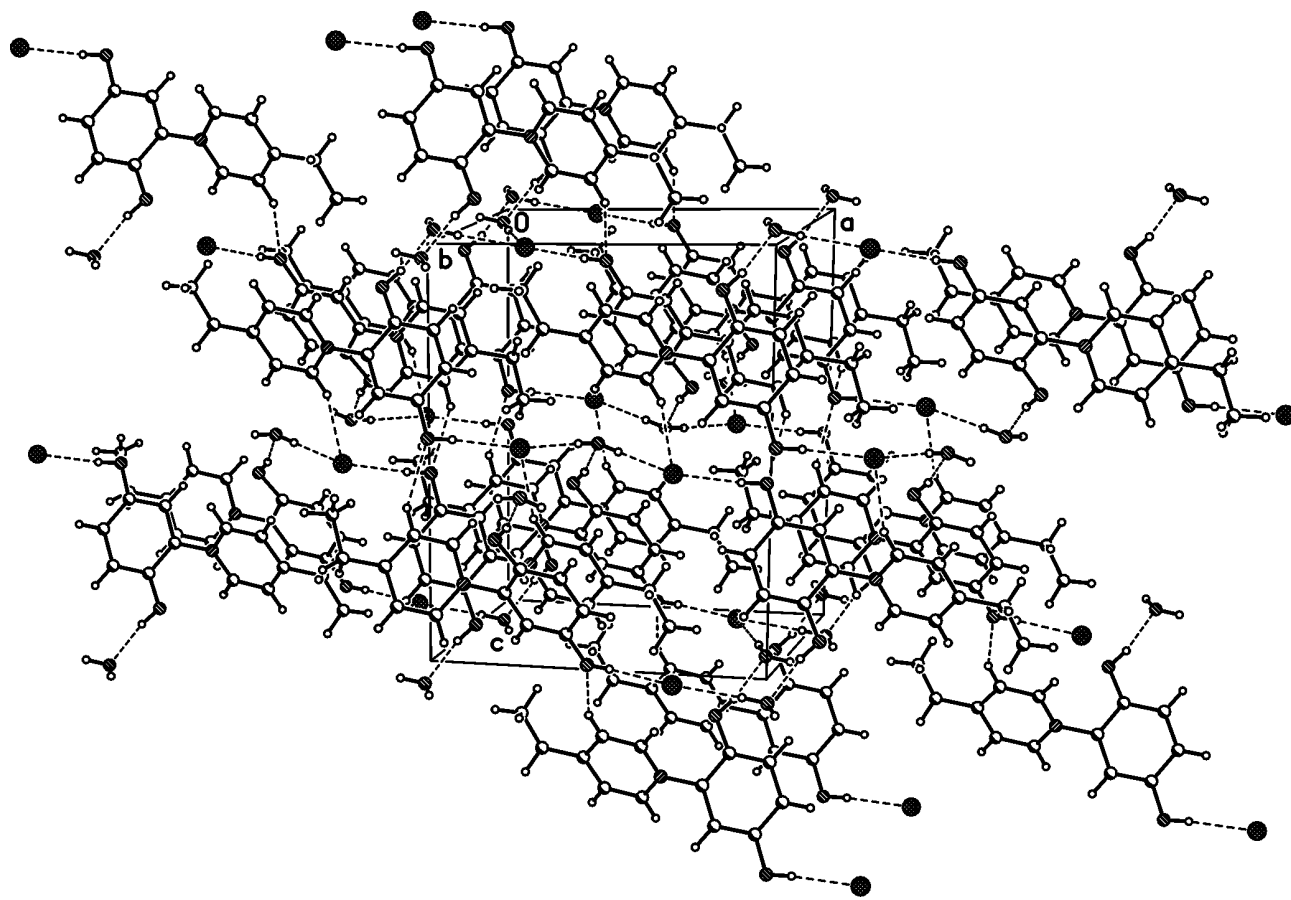

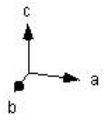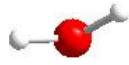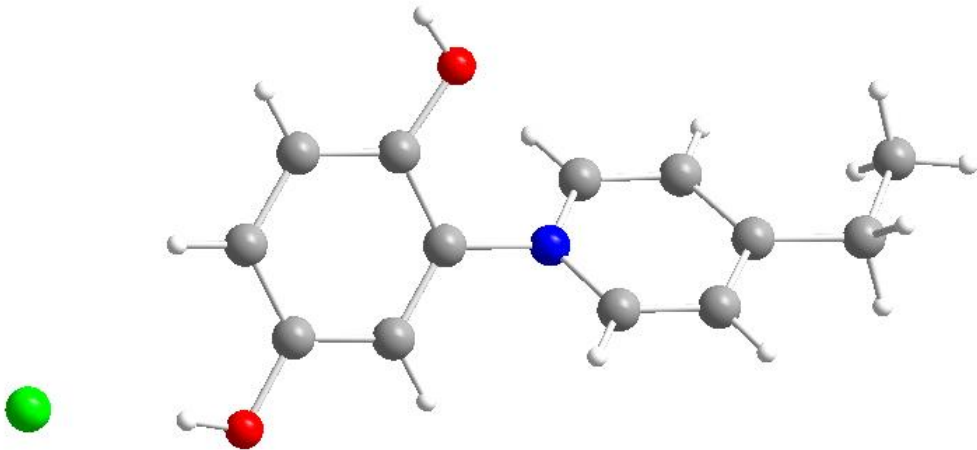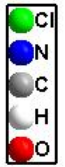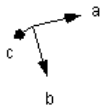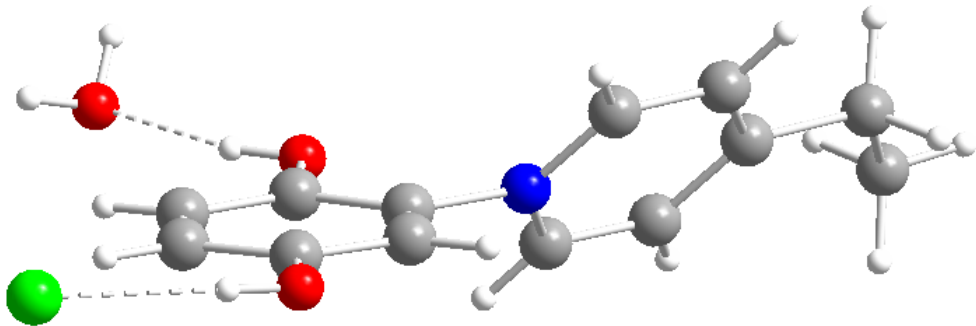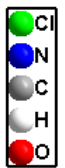



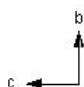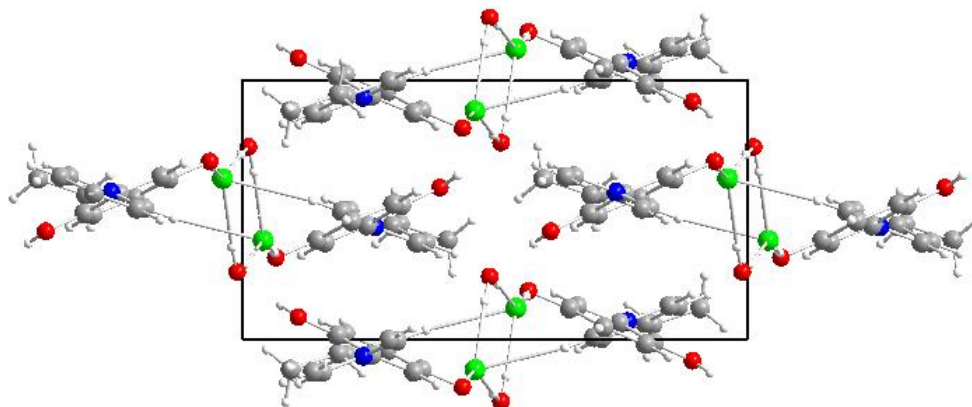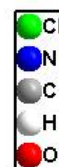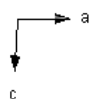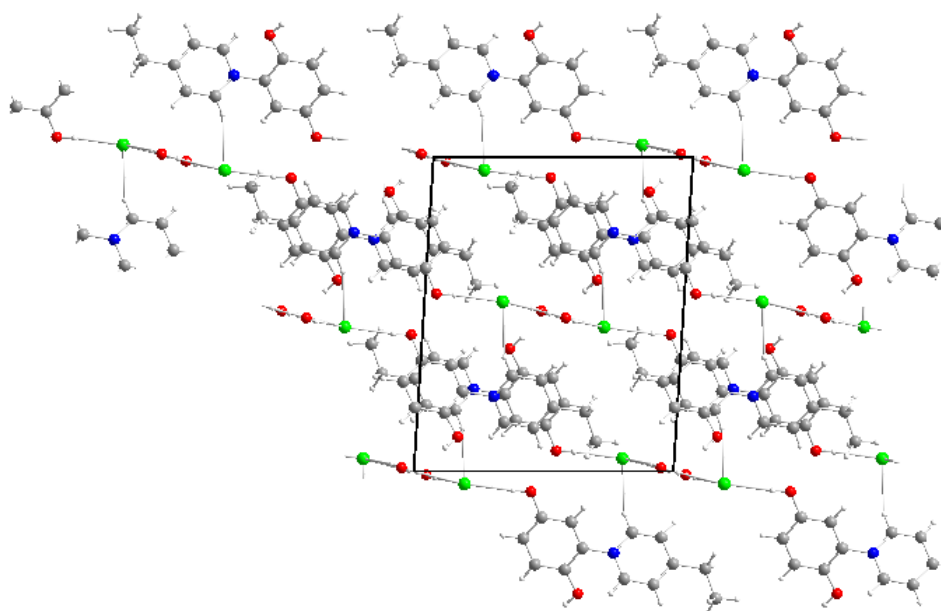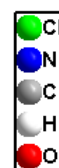

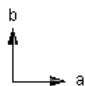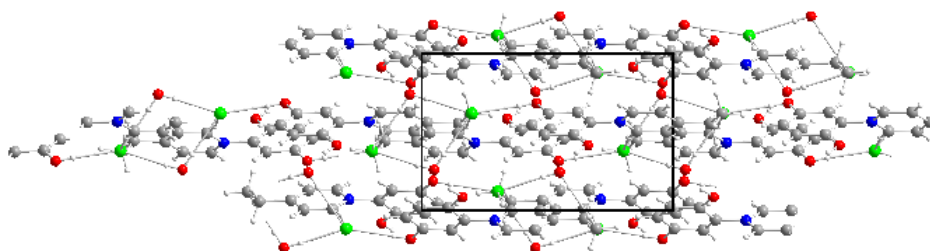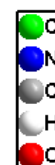

### Computing details

Data collection: *APEX3* (Bruker AXS Inc., 2019); cell refinement: *APEX3* (Bruker AXS Inc., 2019); data reduction: *SAINT* (Bruker AXS Inc., 2019); program(s) used to solve structure: *SHELXT* (Sheldrick, 2015); program(s) used to refine structure: *SHELXL2014/7* (Sheldrick, 2014); software used to prepare material for publication: *publCIF* (Westrip, 2010).

### Special details

|                                                                                                                                                                                                                                                                                                                                                                                                                                                                          |
|--------------------------------------------------------------------------------------------------------------------------------------------------------------------------------------------------------------------------------------------------------------------------------------------------------------------------------------------------------------------------------------------------------------------------------------------------------------------------|
| <i>Experimental.</i> dx = 40 mm, 1 deg., 4+1 runs, 764 frames, 12 sec./frame                                                                                                                                                                                                                                                                                                                                                                                             |
| <i>Geometry.</i> All esds (except the esd in the dihedral angle between two l.s. planes) are estimated using the full covariance matrix. The cell esds are taken into account individually in the estimation of esds in distances, angles and torsion angles; correlations between esds in cell parameters are only used when they are defined by crystal symmetry. An approximate (isotropic) treatment of cell esds is used for estimating esds involving l.s. planes. |

### Fractional atomic coordinates and isotropic or equivalent isotropic displacement parameters ( $\text{\AA}^2$ ) for X

|     | x           | y            | z           | $U_{\text{iso}}^*/U_{\text{eq}}$ |
|-----|-------------|--------------|-------------|----------------------------------|
| Cl1 | 0.19866 (2) | 0.61923 (4)  | 0.04035 (2) | 0.02514 (10)                     |
| N1  | 0.78934 (7) | 0.56721 (11) | 0.26148 (5) | 0.01361 (17)                     |
| C2  | 0.85552 (8) | 0.50638 (13) | 0.19512 (6) | 0.01613 (19)                     |
| H2  | 0.8224      | 0.4659       | 0.1374      | 0.019*                           |
| C3  | 0.96977 (8) | 0.50307 (14) | 0.21095 (7) | 0.0182 (2)                       |
| H3  | 1.0152      | 0.4600       | 0.1640      | 0.022*                           |
| C4  | 1.02056 (8) | 0.56230 (14) | 0.29536 (7) | 0.0166 (2)                       |
| C5  | 0.95049 (8) | 0.62683 (13) | 0.36169 (7) | 0.0170 (2)                       |
| H5  | 0.9820      | 0.6697       | 0.4195      | 0.020*                           |
| C6  | 0.83581 (8) | 0.62854 (13) | 0.34358 (7) | 0.01588 (19)                     |

|      |              |              |             |              |
|------|--------------|--------------|-------------|--------------|
| H6   | 0.7888       | 0.6731       | 0.3891      | 0.019*       |
| C7   | 1.14621 (9)  | 0.55629 (16) | 0.31085 (8) | 0.0237 (2)   |
| H7A  | 1.1790       | 0.6323       | 0.2631      | 0.028*       |
| H7B  | 1.1712       | 0.4304       | 0.3011      | 0.028*       |
| C8   | 1.19361 (10) | 0.61850 (18) | 0.40521 (9) | 0.0316 (3)   |
| H8A  | 1.2757       | 0.6093       | 0.4081      | 0.047*       |
| H8B  | 1.1718       | 0.7444       | 0.4152      | 0.047*       |
| H8C  | 1.1640       | 0.5420       | 0.4533      | 0.047*       |
| C9   | 0.66816 (8)  | 0.56199 (13) | 0.24537 (7) | 0.01433 (19) |
| C10  | 0.60495 (8)  | 0.48489 (13) | 0.31364 (6) | 0.01552 (19) |
| O10  | 0.66046 (6)  | 0.41581 (11) | 0.39031 (5) | 0.02168 (17) |
| H10  | 0.6159 (13)  | 0.369 (2)    | 0.4248 (10) | 0.033*       |
| C11  | 0.48865 (8)  | 0.47994 (14) | 0.29713 (7) | 0.0181 (2)   |
| H11  | 0.4434       | 0.4311       | 0.3428      | 0.022*       |
| C12  | 0.43826 (8)  | 0.54555 (14) | 0.21485 (7) | 0.0183 (2)   |
| H12  | 0.3589       | 0.5412       | 0.2047      | 0.022*       |
| C13  | 0.50296 (8)  | 0.61802 (13) | 0.14668 (7) | 0.0173 (2)   |
| O13  | 0.45648 (6)  | 0.68575 (12) | 0.06532 (5) | 0.02552 (18) |
| H13  | 0.3875 (11)  | 0.666 (2)    | 0.0618 (11) | 0.038*       |
| C14  | 0.61900 (8)  | 0.62732 (13) | 0.16210 (7) | 0.0162 (2)   |
| H14  | 0.6640       | 0.6774       | 0.1166      | 0.019*       |
| O1W  | 0.54826 (7)  | 0.24137 (12) | 0.51117 (6) | 0.02601 (18) |
| H1W1 | 0.4818 (11)  | 0.212 (2)    | 0.4960 (11) | 0.039*       |
| H1W2 | 0.5859 (12)  | 0.145 (2)    | 0.5218 (12) | 0.039*       |

Atomic displacement parameters ( $\text{\AA}^2$ ) for X

|     | $U^{11}$     | $U^{22}$     | $U^{33}$     | $U^{12}$     | $U^{13}$      | $U^{23}$      |
|-----|--------------|--------------|--------------|--------------|---------------|---------------|
| C11 | 0.01603 (14) | 0.03575 (17) | 0.02321 (15) | -0.00048 (9) | -0.00215 (10) | -0.00159 (10) |
| N1  | 0.0119 (4)   | 0.0156 (4)   | 0.0133 (4)   | -0.0007 (3)  | 0.0010 (3)    | 0.0009 (3)    |
| C2  | 0.0165 (4)   | 0.0196 (5)   | 0.0124 (4)   | -0.0019 (3)  | 0.0018 (3)    | -0.0011 (3)   |
| C3  | 0.0162 (5)   | 0.0229 (5)   | 0.0159 (4)   | -0.0004 (4)  | 0.0048 (3)    | -0.0016 (4)   |
| C4  | 0.0134 (4)   | 0.0184 (4)   | 0.0181 (5)   | -0.0015 (3)  | 0.0010 (4)    | 0.0014 (4)    |
| C5  | 0.0159 (5)   | 0.0203 (5)   | 0.0145 (4)   | -0.0017 (3)  | -0.0005 (4)   | -0.0015 (3)   |
| C6  | 0.0168 (5)   | 0.0171 (4)   | 0.0138 (4)   | -0.0004 (3)  | 0.0019 (3)    | -0.0016 (3)   |
| C7  | 0.0125 (4)   | 0.0325 (6)   | 0.0262 (5)   | -0.0002 (4)  | 0.0010 (4)    | -0.0017 (4)   |
| C8  | 0.0184 (5)   | 0.0397 (7)   | 0.0354 (7)   | -0.0018 (5)  | -0.0080 (5)   | -0.0056 (5)   |
| C9  | 0.0113 (4)   | 0.0157 (4)   | 0.0160 (4)   | -0.0007 (3)  | 0.0008 (3)    | -0.0006 (3)   |
| C10 | 0.0157 (4)   | 0.0170 (4)   | 0.0139 (4)   | 0.0004 (3)   | 0.0012 (3)    | 0.0010 (3)    |
| O10 | 0.0164 (3)   | 0.0314 (4)   | 0.0171 (3)   | -0.0021 (3)  | 0.0004 (3)    | 0.0096 (3)    |
| C11 | 0.0158 (5)   | 0.0204 (5)   | 0.0185 (5)   | -0.0006 (4)  | 0.0049 (4)    | 0.0016 (4)    |
| C12 | 0.0124 (4)   | 0.0213 (5)   | 0.0211 (5)   | 0.0002 (3)   | 0.0010 (4)    | 0.0003 (4)    |
| C13 | 0.0159 (5)   | 0.0189 (5)   | 0.0166 (5)   | 0.0007 (3)   | -0.0012 (4)   | 0.0016 (3)    |
| O13 | 0.0158 (3)   | 0.0383 (5)   | 0.0217 (4)   | -0.0019 (3)  | -0.0044 (3)   | 0.0113 (3)    |
| C14 | 0.0151 (4)   | 0.0180 (5)   | 0.0156 (4)   | -0.0015 (3)  | 0.0019 (3)    | 0.0020 (3)    |
| O1W | 0.0192 (4)   | 0.0337 (4)   | 0.0250 (4)   | -0.0065 (3)  | 0.0007 (3)    | 0.0073 (3)    |

Geometric parameters ( $\text{\AA}$ ,  $^\circ$ ) for X

|       |             |         |             |
|-------|-------------|---------|-------------|
| N1—C6 | 1.3565 (12) | C8—H8C  | 0.9800      |
| N1—C2 | 1.3573 (12) | C9—C14  | 1.3924 (13) |
| N1—C9 | 1.4511 (12) | C9—C10  | 1.4007 (13) |
| C2—C3 | 1.3688 (13) | C10—O10 | 1.3553 (12) |
| C2—H2 | 0.9500      | C10—C11 | 1.3942 (13) |
| C3—C4 | 1.3986 (14) | O10—H10 | 0.828 (13)  |
| C3—H3 | 0.9500      | C11—C12 | 1.3867 (14) |
| C4—C5 | 1.3956 (14) | C11—H11 | 0.9500      |

|              |              |                 |              |
|--------------|--------------|-----------------|--------------|
| C4—C7        | 1.5031 (13)  | C12—C13         | 1.3967 (14)  |
| C5—C6        | 1.3775 (14)  | C12—H12         | 0.9500       |
| C5—H5        | 0.9500       | C13—O13         | 1.3641 (12)  |
| C6—H6        | 0.9500       | C13—C14         | 1.3908 (13)  |
| C7—C8        | 1.5156 (16)  | O13—H13         | 0.835 (13)   |
| C7—H7A       | 0.9900       | C14—H14         | 0.9500       |
| C7—H7B       | 0.9900       | O1W—H1W1        | 0.838 (13)   |
| C8—H8A       | 0.9800       | O1W—H1W2        | 0.853 (13)   |
| C8—H8B       | 0.9800       |                 |              |
|              |              |                 |              |
| C6—N1—C2     | 120.36 (8)   | H8A—C8—H8B      | 109.5        |
| C6—N1—C9     | 119.88 (8)   | C7—C8—H8C       | 109.5        |
| C2—N1—C9     | 119.74 (8)   | H8A—C8—H8C      | 109.5        |
| N1—C2—C3     | 120.37 (9)   | H8B—C8—H8C      | 109.5        |
| N1—C2—H2     | 119.8        | C14—C9—C10      | 122.29 (9)   |
| C3—C2—H2     | 119.8        | C14—C9—N1       | 119.43 (8)   |
| C2—C3—C4     | 120.88 (9)   | C10—C9—N1       | 118.24 (8)   |
| C2—C3—H3     | 119.6        | O10—C10—C11     | 124.10 (9)   |
| C4—C3—H3     | 119.6        | O10—C10—C9      | 118.20 (9)   |
| C5—C4—C3     | 117.46 (9)   | C11—C10—C9      | 117.68 (9)   |
| C5—C4—C7     | 122.89 (9)   | C10—O10—H10     | 110.5 (10)   |
| C3—C4—C7     | 119.64 (9)   | C12—C11—C10     | 120.76 (9)   |
| C6—C5—C4     | 120.24 (9)   | C12—C11—H11     | 119.6        |
| C6—C5—H5     | 119.9        | C10—C11—H11     | 119.6        |
| C4—C5—H5     | 119.9        | C11—C12—C13     | 120.70 (9)   |
| N1—C6—C5     | 120.68 (9)   | C11—C12—H12     | 119.7        |
| N1—C6—H6     | 119.7        | C13—C12—H12     | 119.7        |
| C5—C6—H6     | 119.7        | O13—C13—C14     | 117.86 (9)   |
| C4—C7—C8     | 115.97 (9)   | O13—C13—C12     | 122.45 (9)   |
| C4—C7—H7A    | 108.3        | C14—C13—C12     | 119.66 (9)   |
| C8—C7—H7A    | 108.3        | C13—O13—H13     | 109.5 (11)   |
| C4—C7—H7B    | 108.3        | C13—C14—C9      | 118.88 (9)   |
| C8—C7—H7B    | 108.3        | C13—C14—H14     | 120.6        |
| H7A—C7—H7B   | 107.4        | C9—C14—H14      | 120.6        |
| C7—C8—H8A    | 109.5        | H1W1—O1W—H1W2   | 108.2 (14)   |
| C7—C8—H8B    | 109.5        |                 |              |
|              |              |                 |              |
| C6—N1—C2—C3  | 1.23 (14)    | C2—N1—C9—C10    | 130.00 (10)  |
| C9—N1—C2—C3  | -177.11 (9)  | C14—C9—C10—O10  | 176.40 (9)   |
| N1—C2—C3—C4  | -0.12 (15)   | N1—C9—C10—O10   | -1.35 (13)   |
| C2—C3—C4—C5  | -0.90 (15)   | C14—C9—C10—C11  | -1.95 (14)   |
| C2—C3—C4—C7  | 179.74 (10)  | N1—C9—C10—C11   | -179.71 (8)  |
| C3—C4—C5—C6  | 0.84 (15)    | O10—C10—C11—C12 | -176.79 (10) |
| C7—C4—C5—C6  | -179.82 (9)  | C9—C10—C11—C12  | 1.46 (15)    |
| C2—N1—C6—C5  | -1.29 (14)   | C10—C11—C12—C13 | 0.02 (16)    |
| C9—N1—C6—C5  | 177.05 (9)   | C11—C12—C13—O13 | -179.24 (10) |
| C4—C5—C6—N1  | 0.23 (15)    | C11—C12—C13—C14 | -1.10 (15)   |
| C5—C4—C7—C8  | 2.23 (16)    | O13—C13—C14—C9  | 178.86 (9)   |
| C3—C4—C7—C8  | -178.45 (10) | C12—C13—C14—C9  | 0.64 (15)    |
| C6—N1—C9—C14 | 133.84 (10)  | C10—C9—C14—C13  | 0.91 (15)    |
| C2—N1—C9—C14 | -47.82 (12)  | N1—C9—C14—C13   | 178.64 (8)   |
| C6—N1—C9—C10 | -48.34 (12)  |                 |              |

Hydrogen-bond geometry (Å, °) for X

| <i>D</i> —H··· <i>A</i>           | <i>D</i> —H | H··· <i>A</i> | <i>D</i> ··· <i>A</i> | <i>D</i> —H··· <i>A</i> |
|-----------------------------------|-------------|---------------|-----------------------|-------------------------|
| C2—H2···Cl1 <sup>i</sup>          | 0.95        | 2.64          | 3.5494 (10)           | 160                     |
| C5—H5···O13 <sup>ii</sup>         | 0.95        | 2.40          | 3.2510 (12)           | 149                     |
| C6—H6···Cl1 <sup>ii</sup>         | 0.95        | 2.93          | 3.8519 (10)           | 164                     |
| O10—H10···O1W                     | 0.83 (1)    | 1.80 (1)      | 2.6086 (11)           | 167 (2)                 |
| O13—H13···Cl1                     | 0.84 (1)    | 2.28 (1)      | 3.1150 (8)            | 175 (2)                 |
| O1W—<br>H1W1···Cl1 <sup>iii</sup> | 0.84 (1)    | 2.29 (1)      | 3.1275 (8)            | 177 (2)                 |
| O1W—<br>H1W2···Cl1 <sup>iv</sup>  | 0.85 (1)    | 2.38 (1)      | 3.2271 (9)            | 175 (2)                 |

Symmetry codes: (i)  $-x+1, -y+1, -z$ ; (ii)  $x+1/2, -y+3/2, z+1/2$ ; (iii)  $-x+1/2, y-1/2, -z+1/2$ ; (iv)  $x+1/2, -y+1/2, z+1/2$ .

## 11. Flotation of lithium aluminate using punicine 5 at pH 2.

| Carbon Chain length | Daylight   | Darkness   | UV         | Daylight              | Darkness            | UV                  |
|---------------------|------------|------------|------------|-----------------------|---------------------|---------------------|
|                     | Yield in % | Yield in % | Yield in % | Confidence interval % | Confidence interval | Confidence interval |
| <b>0</b>            | 28.56      | 27.22      | 27.00      | 1.89                  | 6.69                | 6.85                |
| <b>1</b>            | 32.71      | 42.96      | 44.06      | 4.36                  | 6.47                | 7.46                |
| <b>2</b>            | 38.33      | 43.51      | 40.42      | 7.19                  | 6.17                | 6.32                |
| <b>8</b>            | 45.37      | 53.22      | 50.42      | 5.39                  | 5.21                | 5.97                |
| <b>11</b>           | 44.09      | 47.73      | 54.85      | 2.63                  | 1.56                | 2.00                |

Table 4: Flotation of lithium aluminate using different punicine derivatives as collector at pH 2, and under different light conditions. The conditioning here was as following: 60  $\mu$ l collector, 1 min mixing, 30  $\mu$ l foamer, 1 min mixing, stirring speed 500 rpm, air flow rate 32 ml/min using 250 mL distilled water and flotation time 3 min.

## 12. XRD of Lithium aluminate and Gehlenite mix

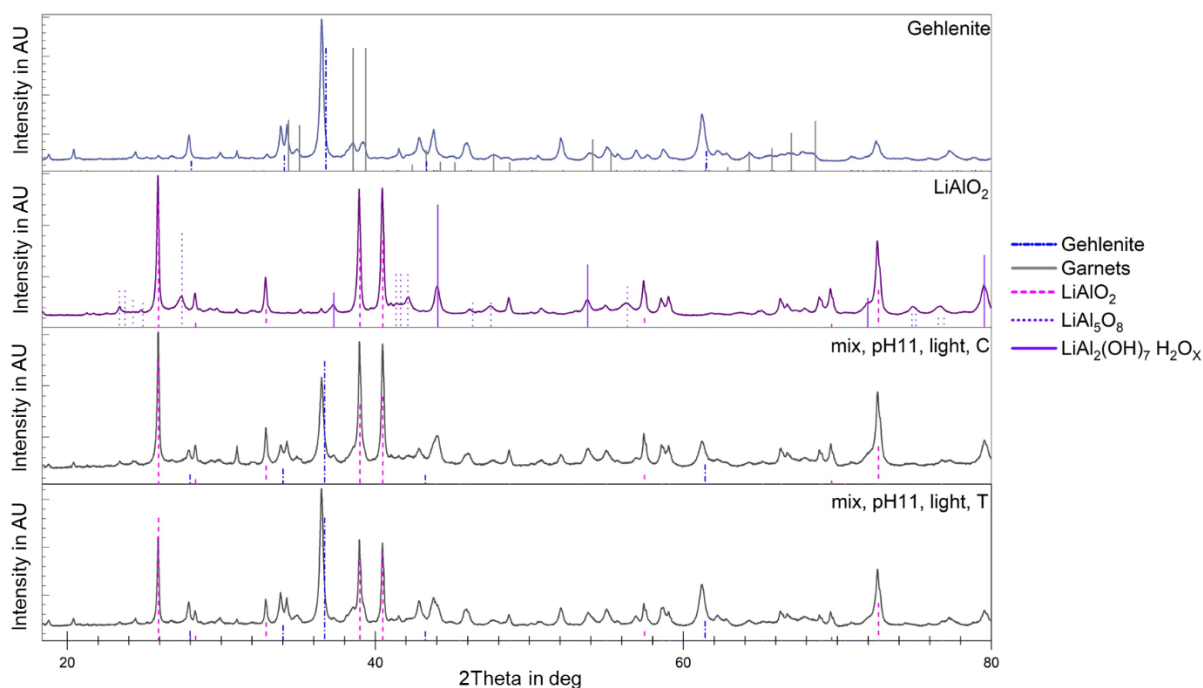

Figure 28: The figure shows the XRD results from the top of gehlenite, lithium aluminate and the floated mixture 1:1 by weight gehlenite and lithium aluminate where C (Concentrate) and T (Tailing) with the conditions punicine 5, pH11 and light. The difference in Intensity of the reflexes typical for lithium aluminate (40.5 deg) and for gehlenite (36.7) picture the different amount of each compound.

13. Wettability measurements

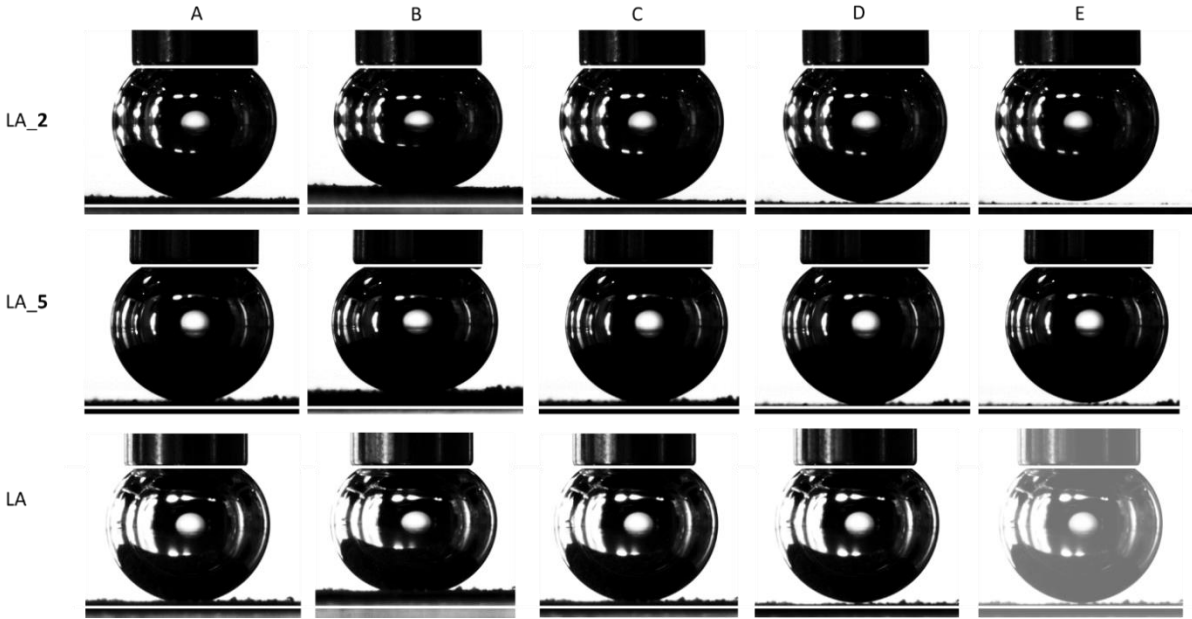

Figure 29: The figure pictures the wettability measurements for conducting the contact angle of lithium aluminate (LA) conditions with punicine 2 (LA\_2) and 5 (LA\_5) as well as the pinning behavior of bubbles on the particle bed. (A) contact angle beginning, (B) pressing particle bed against bubble with a certain pressure, (C) apparent contact angle, (D) pinning of bubble, (E) detaching of bubble from particle bed. In LA no pinning occurred in (D) so the bubble instantly detached from the particle bed (E).

14. Contact angle of lithium aluminate and gehlenite with punicine 2-5.

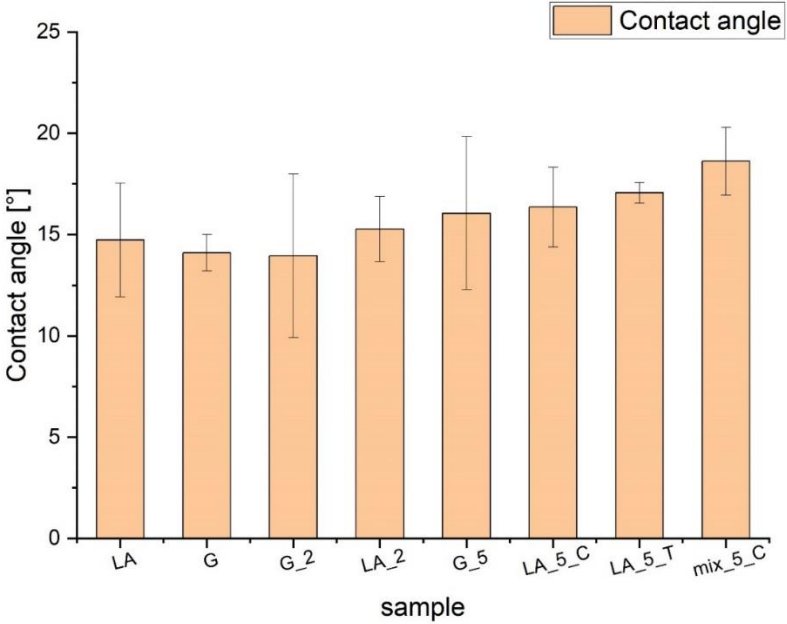

Figure 30: Apparent contact angle of lithium aluminate (LA) and gehlenite (G) and mix (1:1 gehlenite and lithium aluminate), conditioned with punicines 2 and 5 as well as samples resulting from flotation at pH 11. C (Concentrate), T (Tailing). Confidence interval is 95%.



## 15. Specification of the LEDs

Source: Avonec - 3W High Power LED auf Starplatine 390nm - 400nm UV-A, retrieved on 02.02.2023.

### Outline Dimensions

#### 1、 Dome Type

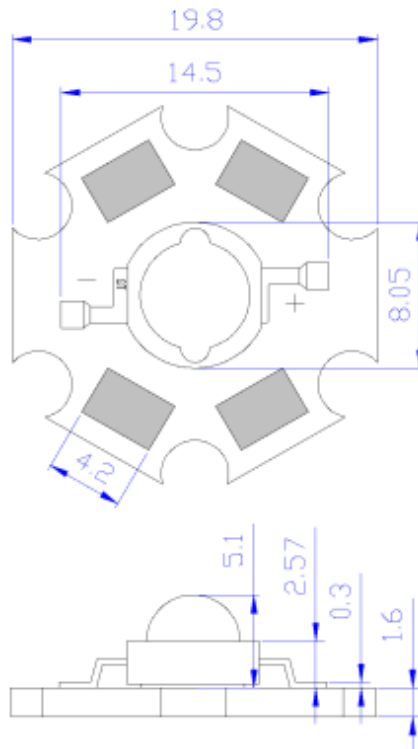

#### 2、 Circuit diagram

INTERNAL CIRCUIT DIAGRAM

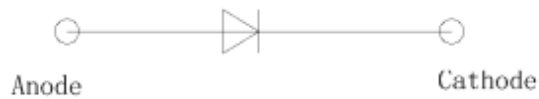

#### Notes

1. All dimensions are in millimeters.(tolerance:±0.2)
2. Dimension Scale:1:1

\*The appearance and specifications of the product may be changed for improvement without notice.

## Parameters

### Electrical-Optical Characteristics at IF=750mA, Ta=25°C

| Parameter          | Symbol          | Min  | Typ | Max  | Unit |
|--------------------|-----------------|------|-----|------|------|
| Radiation flux     | $\phi_e$        | 900  | ~   | 1000 | mw   |
| Wavelength         | $\lambda_D$     | 390  | ~   | 400  | nm   |
| Forward Voltage    | $V_F$           | 3.5  | ~   | 4.5  | V    |
| Power Dissipation  | $P_D$           | 2.63 | ~   | 3.38 | W    |
| View Angle         | $2\theta_{1/2}$ | ~    | 120 | ~    | deg. |
| Thermal Resistance | $R\theta_{J-B}$ | ~    | 12  | ~    | °C/W |

### Absolute Maximum Ratings

| Parameter                                | Symbol    | Value                              | Unit  |
|------------------------------------------|-----------|------------------------------------|-------|
| Forward Current                          | $I_F$     | 750                                | mA    |
| Junction Temperature                     | $T_j$     | 115                                | °C    |
| Operating Temperature                    | $T_{opr}$ | -40~+60                            | °C    |
| Storage Temperature                      | $T_{stg}$ | 0~+60                              | °C    |
| ESD Sensitivity                          | ~         | ±2,000V HBM                        | ~     |
| Temperature Coefficient of voltage       | ~         | -5                                 | mV/°C |
| DC Pulse Current(@ 1 KHz,10% duty cycle) | $I_{FP}$  | 1000                               | mA    |
| Reverse Voltage                          | $V_R$     | Not designed for reverse operation |       |

#### \*Notes

1. Tolerance of Luminous Flux is ±3%.
2. Tolerance of Forward Voltage is ±0.1V.

## Typical Characteristic Curves(1)

### 1. Typical Light Distribution Curve

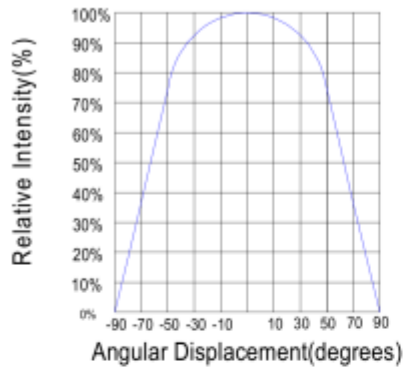

### 2. Typical Light-Emitting Angle Radiation Pattern

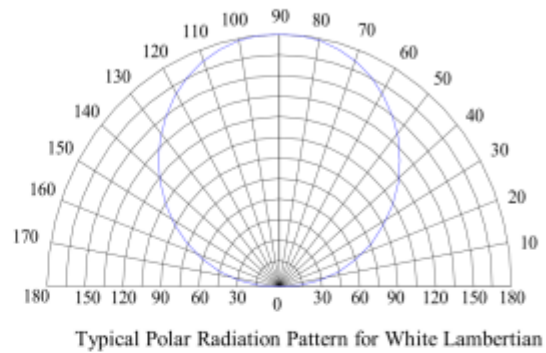

### 3. Forward Current vs. Relative Luminous Flux Curve

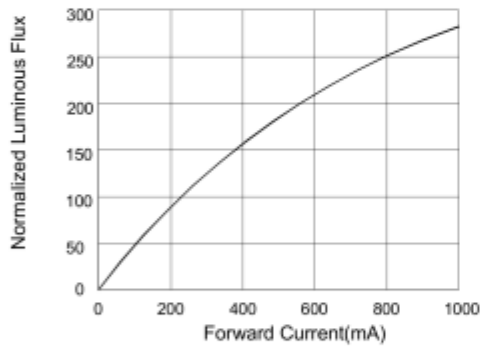

### 4. Forward Current Derating Curve, Derating based on $T_{max}=125^{\circ}C$

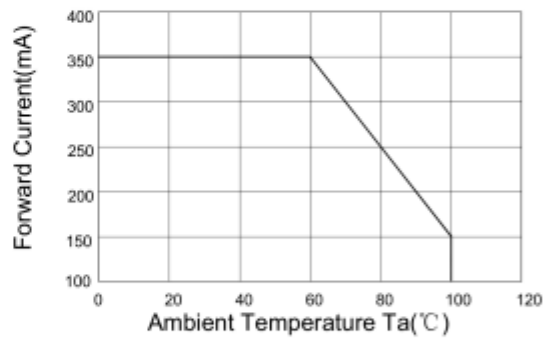

### 5. Electrical Characteristics Curve

#### 5-1. White, Royal Blue, Blue, Green

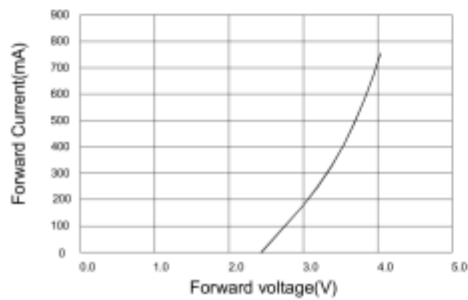

#### 5-2. Amber, Red

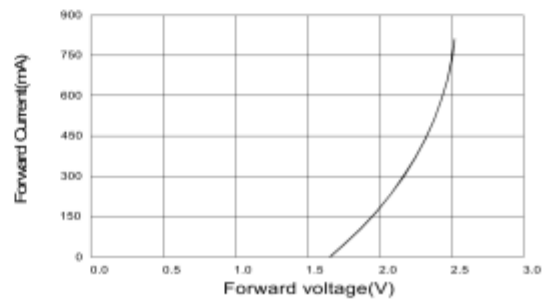

## Typical Characteristic Curves(2)

6-1. Relative Flux vs. Junction Temperature (If = 350 mA) White, Royal Blue, Blue, Green

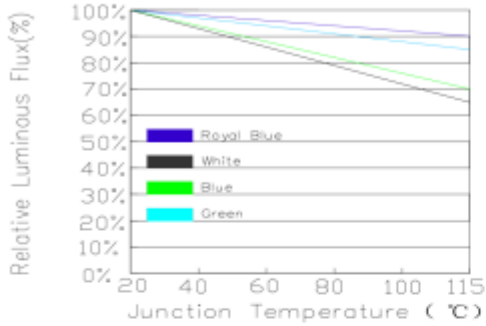

6-2. Relative Flux vs. Junction Temperature (If = 400 mA) Amber, Red

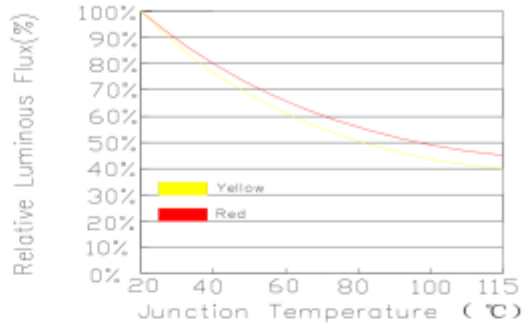

7. Typical white spectral distribution

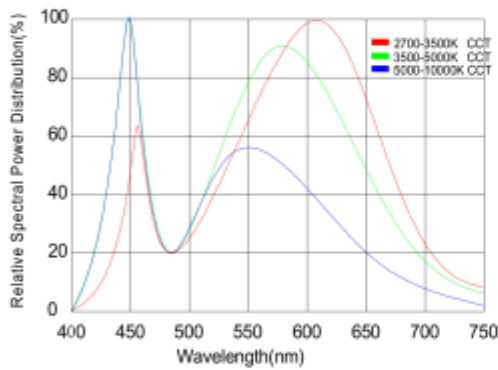

8. Relative Spectral Power Distribution

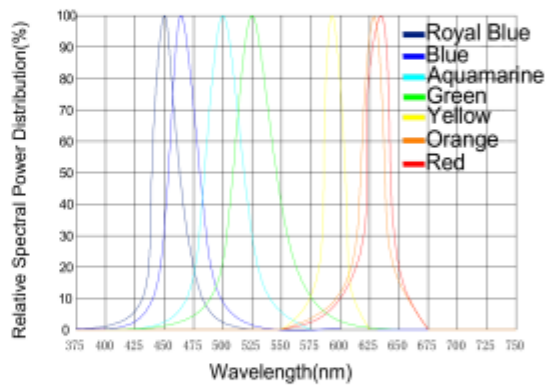

9. Reflow temperature time curve

Reflow Soldering Profile — Lead Free Solder

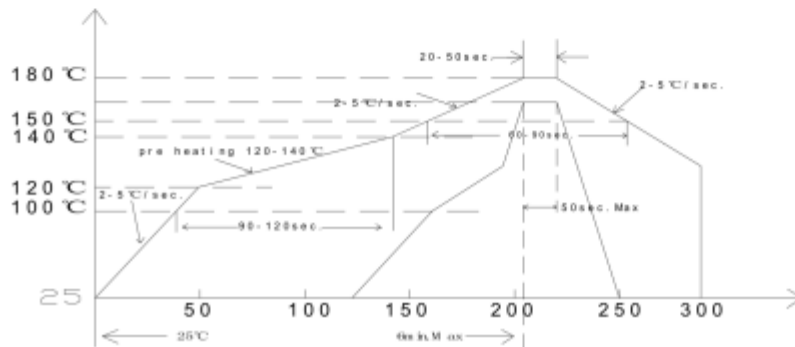

### Reliability Test Items And Conditions

| Test Items                     | Test Condition              | Test Hours Cycles | Sample Size | Ac/Re |
|--------------------------------|-----------------------------|-------------------|-------------|-------|
| DC Aging                       | Ta=25°C<br>IF=750mA         | 1000H             | 22          | 0/1   |
| Hot and cold shock             | -40°C/30min<br>+100°C/30min | 100Cycles         | 22          | 0/1   |
| High Temperature Storage       | Ta=100°C                    | 1000H             | 22          | 0/1   |
| High Temperature High Humidity | 85°C/85%RH                  | 1000H             | 22          | 0/1   |
| Low Temperature Storage        | Ta=-40°C                    | 1000H             | 22          | 0/1   |
| ESD(HBM)                       | 2000V HBM                   | 1Time             | 10          | 0/1   |

### Criteria For Judging the Damage

| Items           | Symbol         | Test Condition        | Criteria For Judging Damage                                                         |
|-----------------|----------------|-----------------------|-------------------------------------------------------------------------------------|
| Forward Voltage | V <sub>F</sub> | I <sub>F</sub> =750mA | Initial Data±10%                                                                    |
| Reverse Current | I <sub>R</sub> | V <sub>R</sub> =5V    | I <sub>R</sub> ≤10μA                                                                |
| Luminous Flux   | φ <sub>v</sub> | I <sub>F</sub> =750mA | Average φ <sub>v</sub> degradation≤20%<br>Single LED φ <sub>v</sub> degradation≤30% |

## Soldering Condition

| Reflow Soldering            |                          |                  | Manual Welding   |                |
|-----------------------------|--------------------------|------------------|------------------|----------------|
|                             | High temperature PC lens | Molding products | Temperature      | Soldering time |
| Preheat                     | 100-140°C                | 180-200°C        | Highest<br>350°C | 3ses once      |
| Heatup time                 | 120sec Max               | 120sec Max       |                  |                |
| Peak temperature            | 180°C Max                | 260°C Max        |                  |                |
| Condition of Soldering time | 50sec Max                | 10sec Max        |                  |                |

**\*Notes**

Conventional PC lens products don't use reflow soldering.

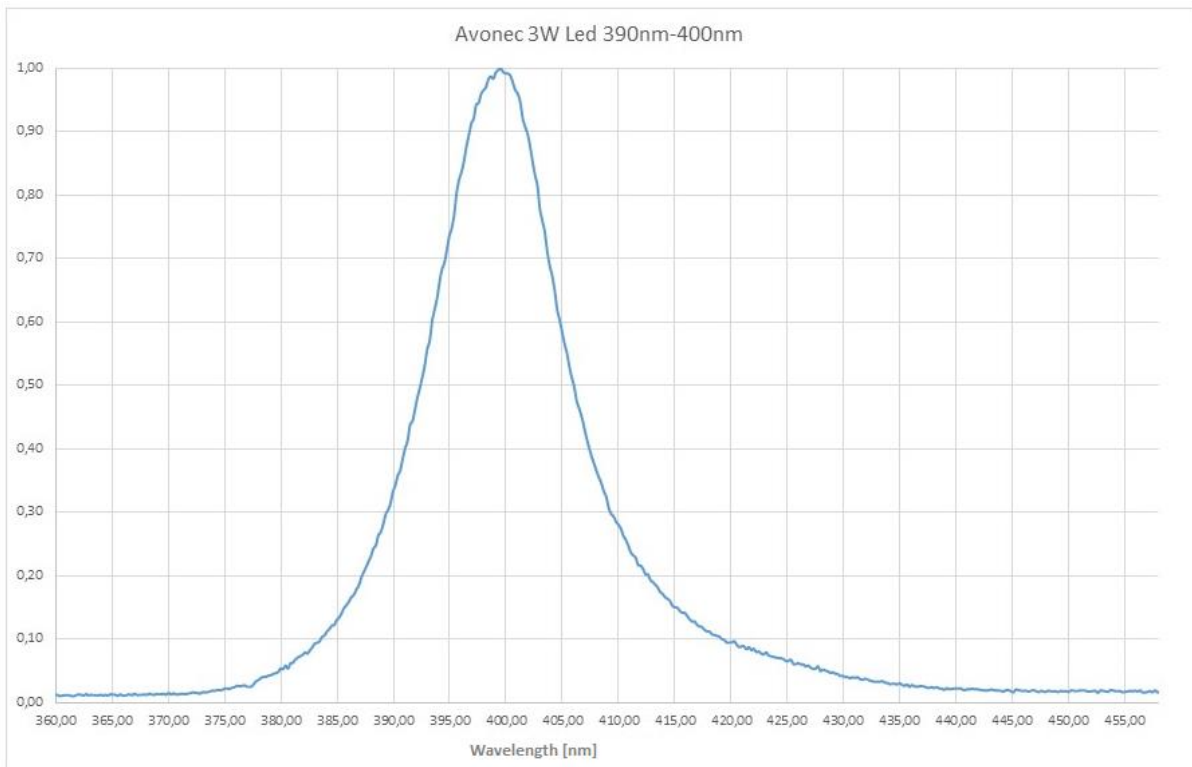

Supplement: d4ra00116h1.pdf [file d4ra00116h1.pdf]
